# Supplementary material
Source: PubMed Central journal article supplement (PMC7395444)
Supplement: pnas.2000078117.sapp.pdf [file pnas.2000078117.sapp.pdf]

## PNAS Template for Supplementary Information

This PNAS template for Supplementary Information (SI) may be used to organize your supplementary material. **Once formatted, this first page should be deleted.** The template is intended to provide a clearly organized SI Appendix PDF file that will ensure readers can easily navigate to sections or specific figures and tables. Movie files or large datasets can be presented as separate files. Further information is available in our [Information for Authors](#).

### Using the Template

Paste the appropriate text (title, author list, and corresponding authors) into the cover page). You may maintain this formatting, or reapply the styles after pasting your text into the template. On the cover page, complete the relevant description of the SI (by deleting text that does not apply).

Figures should be placed on separate pages with legends set immediately below each figure. Table titles should be set immediately above each table. Note that tables extending beyond the width of the page can be included in the PDF; nonstandard page sizes are accepted as part of your SI Appendix file.

References cited in the SI Appendix should be included in a separate reference list at the end of this file.

### Submitting SI

Delete this first page, and then save your completed SI Appendix file as a PDF for submission, following instructions available [here](#).

*Updated June 2019*

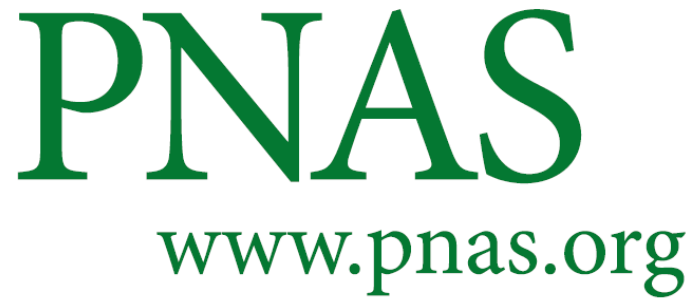

Supplementary Information for

**Robustness of plant quantitative disease resistance is provided by a decentralized immune network**

**Florent Delplace<sup>a,1</sup>, Carine Chauveau<sup>a,1</sup>, Ullrich Dubiella<sup>a,b</sup>, Mehdi Khafif<sup>a</sup>, Eva Alvarez<sup>a</sup>, Gautier Langin<sup>a</sup>, Fabrice Roux<sup>a</sup>, Rémi Peyraud<sup>a,c</sup> and Dominique Roby<sup>a</sup>**

Dominique Roby  
Email: [Dominique.robey@inrae.fr](mailto:Dominique.robey@inrae.fr)

**This PDF file includes:**

Supplementary text  
Figures S1 to S13  
Tables S1 to S4  
Legends for Dataset S1 and S2  
SI References

**Other supplementary materials for this manuscript include the following:**

Dataset S1  
Dataset S2

## Supplementary Information Text

### Material and methods.

#### Plant growth and bacterial inoculation.

*Arabidopsis thaliana* Col-0 accession was grown on Jiffy pots in a growth chamber at 22 °C with a 9-h photoperiod at 192  $\mu\text{mol m}^{-2} \text{s}^{-1}$ . 4 week-old plants were used for experiments. Arabidopsis T-DNA insertion mutant lines were obtained from the Nottingham Arabidopsis Stock Centre. Homozygous lines were identified by PCR genotyping to precise the T-DNA insertion site (Table S3). The inoculation tests were done with the strain LMG568/ATCC33913 (*Xcc568*) (1) carrying the LUX operon of *Photorhabdus luminescens* (2) and *Xcc568* $\Delta$ XopAC (kindly provided by L. Noel). Bacterial cultures of *Xcc568* were done at 28°C on Kado medium supplemented with 50 mg/mL rifampicin and 25 mg/mL kanamycin and Kado medium supplemented with 50 mg/mL rifampicin for *Xcc568* $\Delta$ XopAC.

#### Constructs and plant transformation

The *RKS1-OE* construct was performed by amplification of the *RKS1* coding sequence (AT3G57710) using [attB1F-710 + attB2R-710] as primers (Table S4). PCR products were cloned in pDONR207 and transferred into the T-DNA binary vector pBIN19 using the Gateway technology (Invitrogen) for *Agrobacterium*-mediated transformation of Arabidopsis Col-0 using the floral dip transformation (3). Harvested seeds were spread on MS medium containing 50  $\mu\text{M}$  of Kanamycin for selection of transgenic plants. C-terminal fusion of RKS1 with GFP was accomplished using a multisite Gateway cloning strategy (Invitrogen) described previously (4). RKS1 was amplified from cDNA using [attB1\_RKS1 + attB4\_RKS1] (Table S4) and recombined into the multisite Gateway entry vector pBSDONR P1-P4. YFP was cloned into the entry vector pBS-DONR P4-P2. To fuse RKS1 with eGFP both vectors were mixed with either the 35S plant expression vector pEarleyGate100 (5) and recombined with LR clonase II (Invitrogen). The catalytic RKS1 mutant was generated using RKS1\_D191A\_fw and RKS1\_D191A\_rev as primers (Table S4). For transient expression assays, *Agrobacterium* strain GV3101 or C58C1 carrying the corresponding construct

was used. Arabidopsis seedlings were transformed according to Marion *et al.* (6). Overnight cultures of *Agrobacterium tumefaciens* were resuspended in 2 ml of 5% sucrose supplemented with acetosyringone (200  $\mu$ M). Then one week-old seedlings were vacuum-infiltrated with the *Agrobacterium* solution.

### **Fluorescence microscopy**

Fluorescence images were acquired using a Leica SP8 confocal microscope equipped with a water immersion objective lens ( $\times$  25, numerical aperture 1.20; PL APO). GFP and YFP fluorescence was excited with the 488 nm ray line of the argon laser or the 561 nm ray line of the He-Ne laser respectively. The emission recording bands were set in the 505 to 530 nm range for GFP detection and 520 and 580 nm range for YFP detection. CFP fluorescence was excited with the 458 nm ray line of the argon laser and recorded in the 465–520 nm emission range. Image acquisition was done in the sequential mode using Leica LCS software and analyzed using the ImageJ software. Representative confocal images are shown after histogram normalization. Two fluorescent protein fusion constructs were used that mark different subcellular compartments have been used: MIEL1:CFP as a subcellular marker of the cytoplasm and nucleus of Arabidopsis cells (7) and SYMREM as a subcellular marker of the plasma membrane (8).

### **Yeast Two-Hybrid screening**

To identify proteins interacting with RKS1, RKS1<sub>D191A</sub> were amplified using [attB1\_RKS1 + attB2R-710-stop] cloned into pGBKT7 using Gateway technology (Invitrogen). RKS1<sub>D191A</sub> was used to increase our chances to identify RKS1 interactors, as a mutation of the phosphate transfer site in active kinases is considered to be a substrate trap and has been shown to stabilize interactions with their substrates. A hybrid screen was performed (2 rounds) in the yeast *Saccharomyces cerevisiae* (strain AH109), from a cDNA library made in the vector pGADT7 from *Arabidopsis thaliana* leaves infected with the strain *Xcc147* (9). The screens were performed following the protocol described previously by Gietz and Schiestl (10). The transformed yeasts were selected on SD / -Leu / -Trp / -His solid medium (1<sup>st</sup> round) and on the same medium with 25 mM 3AT (3-amino-1, 2,4-triazole) (2<sup>nd</sup> round). Then the protein interactions were demonstrated using a more stringent medium, SD / -Leu / -Trp / -His / -Ade.

### **Plant phenotyping**

After one night under high humidity conditions (9h light/15h dark and 90% relative humidity, 4 week-old plants were inoculated by piercing with a *Xcc568* bacterial suspension of 2.10<sup>8</sup> colony forming units (CFU).mL<sup>-1</sup>. We performed a scoring of the symptoms as already described (11). Each line was tested in at least three separate experiments where Col-0 and the *rks1-1* mutant were inoculated as controls.

*In planta* bacterial growth analysis (colony forming unit (CFU)/cm<sup>2</sup> expressed in a log<sub>10</sub> scale) was performed as described by Froidure et al. (9). Because *Xcc* is a vascular bacterium, bacterial growth was measured 0 and 7 days after inoculation by piercing with *Xcc* strain 568, at distance from the inoculation zone (at the tip of the inoculated leaves). Data were collected from three independent experiments, each time point corresponds to 6 independent measurements, each on 3–5 individual plants (four leaves/plant). At the inoculation site (basis of the inoculated leaves), bacterial growth was measured and found similar among the different lines.

### **RNA extraction and Quantitative Real-Time PCR analysis**

Total RNA was isolated using the NucleoSpinRNA Plus kit from Macherey-Nagel following the manufacturer's instructions. Purified RNA was quantified with Nanodrop and quality control was done using Agilent. Quantitative RT-PCR analysis was performed as described (9). The housekeeping gene *MON1* (AT2G28390), *PR1* (AT2G14610), *RKS1* and *MPK3* (AT3G45640) (Table S4) genes were used to control the reproducibility between the 3 transcriptomic experiments. cDNA synthesis was performed using 1.5 µg of total RNA and the Roche Transcriptor Reverse Transcriptase (Roche diagnostics GmbH (Mannheim, Germany) according to the manufacturer's instructions. Results were analyzed using the LC480 on-board software, release version 1.5.0.39. The real-time PCR was conducted with at least five experimental replicates for each biological sample. Statistical analyses for Q-PCR were performed with the Wilcoxon test. Groups were defined for different lines as compared to Col-0.

### **Protein extraction and western blotting**

Total protein was extracted using the Laemmli buffer from 4-week leaves and separated on SDS-PAGE (12). For detection of tagged proteins, blots were incubated with rabbit anti-GFP antibody (AMS Biotechnology, [1:5,000]) and goat anti-rabbit IgG HRP coupled secondary antibody (Millipore, [1:20,000]). Proteins were visualized using the Clarity Western ECL substrate kit (Bio-Rad).

### **Transcriptomic analyses**

Arabidopsis plants mis-expressing *RKS1* (AT3G57710) (*rks1-1*, *RKS1-si24* and *si15* lines (13) *RKS1-OE1* and *OE2* lines were used. Three independent experiments were performed. Each replicate included 96 plants: 6 plants per line, 4 lines (*rks1-1*, *RKS1-OE1*, *RKS1-si24* and Col-0) and 4 time points (0, 1.5, 3 and 6 hours post-inoculation). For inoculation, 5 leaves per plant were infiltrated with a blunt-ended syringe containing the bacterial suspension of *Xcc568* at 2.10<sup>8</sup> colony forming units (CFU).mL<sup>-1</sup>.

Samples were sequenced by Fasteris on an Illumina HiSeq 2500 instrument using a base calling pipeline integrating HiSeq Control Software 2.0.5, RTA 1.17.20.0 and CASAVA-1.8.2. A single

HiSeq 2500 Flow cell (v3) was used with the kit TruSeq SBS Kit v3 in order to generate stranded single reads of 100nt. The three replicates were sequenced on three different lanes. The total number of raw reads ranged from 3,471,313 to 45,251,051 (Dataset S1). Reads were mapped on Col-0 genome downloaded from TAIR (<https://www.arabidopsis.org/>) using the glint software (<http://lipm-bioinfo.toulouse.inrae.fr/download/glint/> release glint-1.0.rc6) with parameters set as follows: matches  $\geq 50$  nucleotides, with  $\leq 3$  mis-matches, no gap allowed, only best-scoring hits taken into account (`--lmin 50 --mmis 3 --best-score --no-gap -C 0`). Ambiguous matches (same best score) were removed. Bedtools (2010) were used to compute counts at the gene level (gene models version: TAIR10\_GFF3\_genes.gff) taking into account the strand (`intersectBed -f 0.8 -s`). The number of unambiguously mapped reads that span gene models ranged from 3,293,054 to 41,653,761 (Dataset S1). Raw and normalized RNAseq data have been deposited in the SRA database (accession number SRP233656).

### Statistical analyses

We used the software R version 3.4.2 (2017-09-28) and gene counts were normalized using edgeR\_3.16.5 limma\_3.30.0 package. A Principal Component Analysis (PCA) on the 33,602 genes was performed using the ade4 1.7-6 version package in the R environment. To identify the main drivers of global change of expression across the genome, we ran the following model under the SAS environment with inference performed using REML estimation (PROC MIXED procedure in SAS9.3, SAS Institute Inc.) for each of three first Principal Components (PCs):

$$Y_{ij} = \mu_{\text{trait}} + \text{line}_i + \text{time}_j + \text{line}_i * \text{time}_j + \varepsilon_{ij}$$

where 'Y' corresponds to the coordinates of all the samples on one of the three PCs, ' $\mu$ ' is the overall mean; 'line' accounts for differences among *A. thaliana* lines; 'time' accounts for differences among the four time points; ' $\varepsilon$ ' is the residual term. The variance explained by each of the three model terms was estimated based on variance components estimated by REML (PROC VARCOMP procedure in SAS 9.3, SAS Institute Inc.), For each time point, the 'line' effect on global change of expression was tested with the following model:  $Y_i = \mu_{\text{trait}} + \text{line}_i + \varepsilon_i$

Genes deregulated in their expression after *Xcc568* inoculation were identified using a hypergeometric test with a significance threshold of 0.05 after a Benjamini and Hochberg FDR correction. GO annotation analysis on gene and classification were done using using BINGO module from Cytoscape.

Comparison of kinetics of disease scores. We fitted the temporal relation between the disease index of Col-0 and each tested mutant. We fitted the temporal relation of disease index between the tested mutant and Col-0 by a second order polynomial. Kinetics of disease index were considered similar if the coefficient of the second order terms was not significantly different from 0 and if the slope was not significantly different from 1. P-value numbers represent kinetic modeling

deference with Col-0, 0 = p-value>0.05 and 1= p-value<= 0.05. The fit and statistical testes were implemented in R (<https://www.R-project.org/>) and based on the lm library.

### **Network reconstruction**

Interactors of the 268 co-regulated genes and the 41 potential interactors of RKS1<sub>D191A</sub> identified by Yeast Two Hybrid screens were recovered from Arabidospis BioGRID protein interaction datasets version 3.5.179 (14). Each interaction was manually verified and curated with UniProtKB databases (Swiss-Prot or TrEMBLversion 01-2019). To increase the robustness of the network, a protein-protein localization-based filter was performed. 1886 protein-protein interactions were conserved corresponding to proteins described in the same or associated sub-cellular compartment. Protein-Protein Interactions were plotted with Cytoscape software v3.7.2. GO annotation analysis on gene and classification were done using BINGO module from Cytoscape. Using BINGO classification, each protein was attributed to a functional group. Expression classes were recovered for the 268 co-regulated genes and plotted in the network. Network connectivity was calculated using Cytoscape.

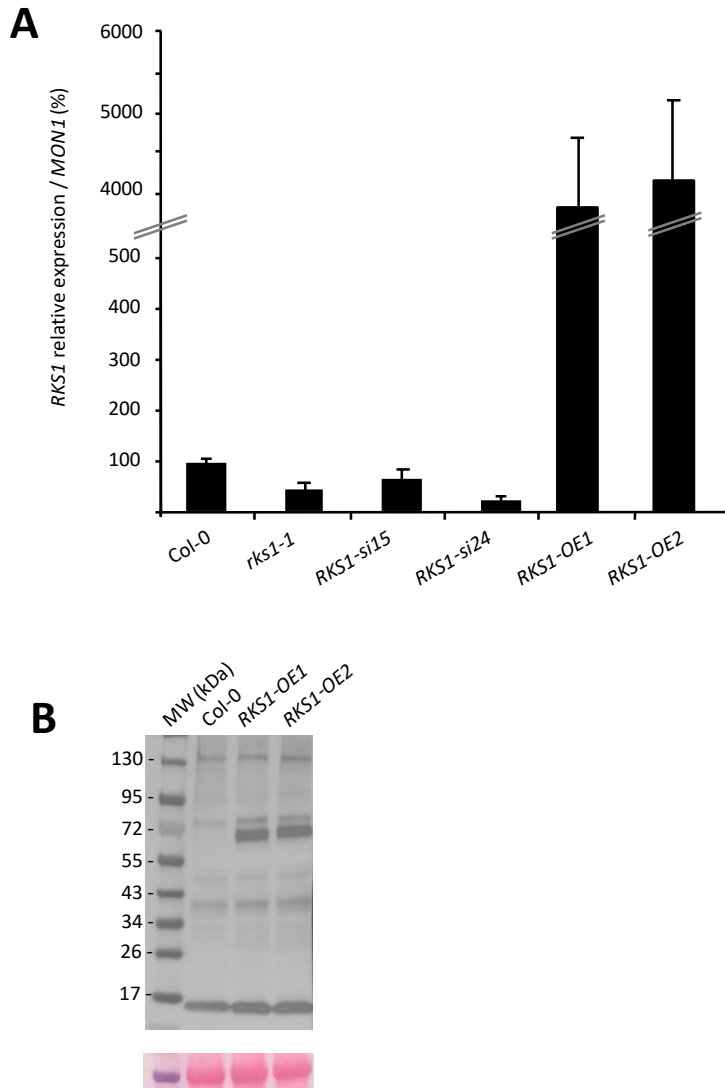

**Fig. S1.** Characterization of the *RKS1* overexpressing lines used in this study. Expression analysis of *RKS1* gene (A) by quantitative RT-PCR in the *RKS1-OE1* and *RKS1-OE2* lines, as compared to the *RKS1-si15* and *-si24* lines, the *rks1-1* mutant and the wild-type Col-0; (B) by Western blot analysis using YFP antibodies in the *RKS1-OE1* and *RKS1-OE2* lines, as compared to the wild type Col-0. On the 1<sup>st</sup> line, the protein ladder (Thermofisher) with the molecular weight (MW) of the proteins is indicated. Ponceau S staining of total protein transferred to the nitrocellulose membrane (bottom) demonstrates sample loading.



**A**

| Line             | Disease index |       |       |       |        | Standard deviation |       |       |       |        | nb_exp | nb_plants | Diff | Intercept | iLCI | iUCI | Slope | sLCI  | sUCI  |  |
|------------------|---------------|-------|-------|-------|--------|--------------------|-------|-------|-------|--------|--------|-----------|------|-----------|------|------|-------|-------|-------|--|
|                  | 3 dpi         | 5 dpi | 6 dpi | 7 dpi | 10 dpi | 3 dpi              | 5 dpi | 6 dpi | 7 dpi | 10 dpi |        |           |      |           |      |      |       |       |       |  |
| Col              | 0             | 0.16  | 0.40  | 0.63  | 0.85   | 0                  | 0     | 0     | 0     | 0      | 3      | 12        |      |           |      |      |       |       |       |  |
| <i>rks1-1</i>    | 0.04          | 1.19  | 1.52  | 1.94  | 2.60   | 0                  | 0.1   | 0.1   | 0.1   | 0      | 3      | 12        | 1    | 0         | 0    | 0    | 2.77  | 1.76  | 3.79  |  |
| <i>RKS1-si15</i> | 0.01          | 0.69  | 0.99  | 1.26  | 2.15   | 0                  | 0     | 0     | 0     | 0      | 3      | 18        | 1    | 0         | 0    | 0    | 2.33  | 1.87  | 2.79  |  |
| <i>RKS1-si24</i> | 0.07          | 0.46  | 1.33  | 1.65  | 2.14   | 0                  | 0     | 0.1   | 0.1   | 0.1    | 3      | 18        | 1    | 0         | 0    | 0    | 2.34  | 1.58  | 3.09  |  |
| <i>RKS1-OE1</i>  | 0             | 0     | 0     | 0     | 0.17   | 0                  | 0     | 0     | 0     | 0      | 3      | 18        | 1    | 0.55      | 0.06 | 1.04 | -0.30 | -0.69 | 0.10  |  |
| <i>RKS1-OE2</i>  | 0             | 0     | 0     | 0.01  | 0.07   | 0                  | 0     | 0     | 0     | 0      | 3      | 18        | 1    | 0.20      | 0.11 | 0.30 | -0.10 | -0.17 | -0.02 |  |

**B**

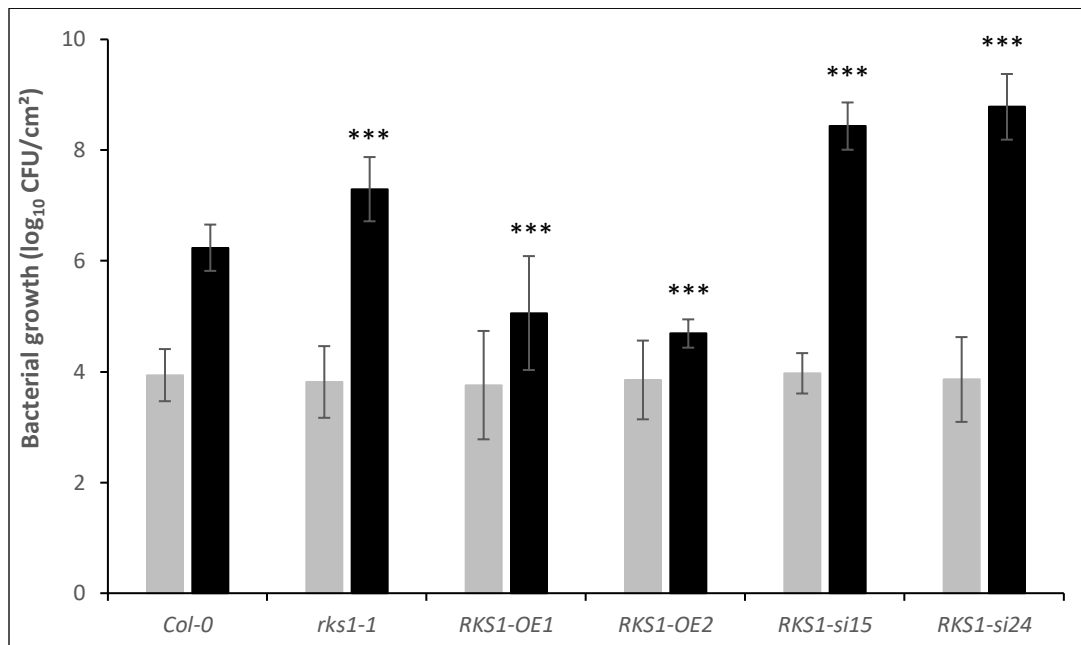

**Fig. S2.** Analysis of *RKS1*-deregulated transgenic lines in response to *Xcc568*. (A) Disease index at 3, 5, 7 and 10 days post-inoculation and statistical data. (B) Bacterial growth measurement (colony forming unit (CFU)/cm<sup>2</sup> expressed in a log<sub>10</sub> scale) in leaves of the wild type accession Col-0 and the different *RKS1* transgenic or mutant lines. Bacterial growth has been measured 0 (grey bars) and 7 (black bars) days after inoculation with *Xcc568* at distance from the inoculation zone (at the tip of the inoculated leaves) with a bacterial suspension adjusted to 10<sup>9</sup> CFU/mL. Data were collected from three independent experiments, each timepoint corresponds to measurements on 3–5 individual plants (four leaves/plant). Statistical analysis was performed using the non-parametric T-test with Welch correction and bacterial growth of Col-0 at day 0 or day 7 as reference.

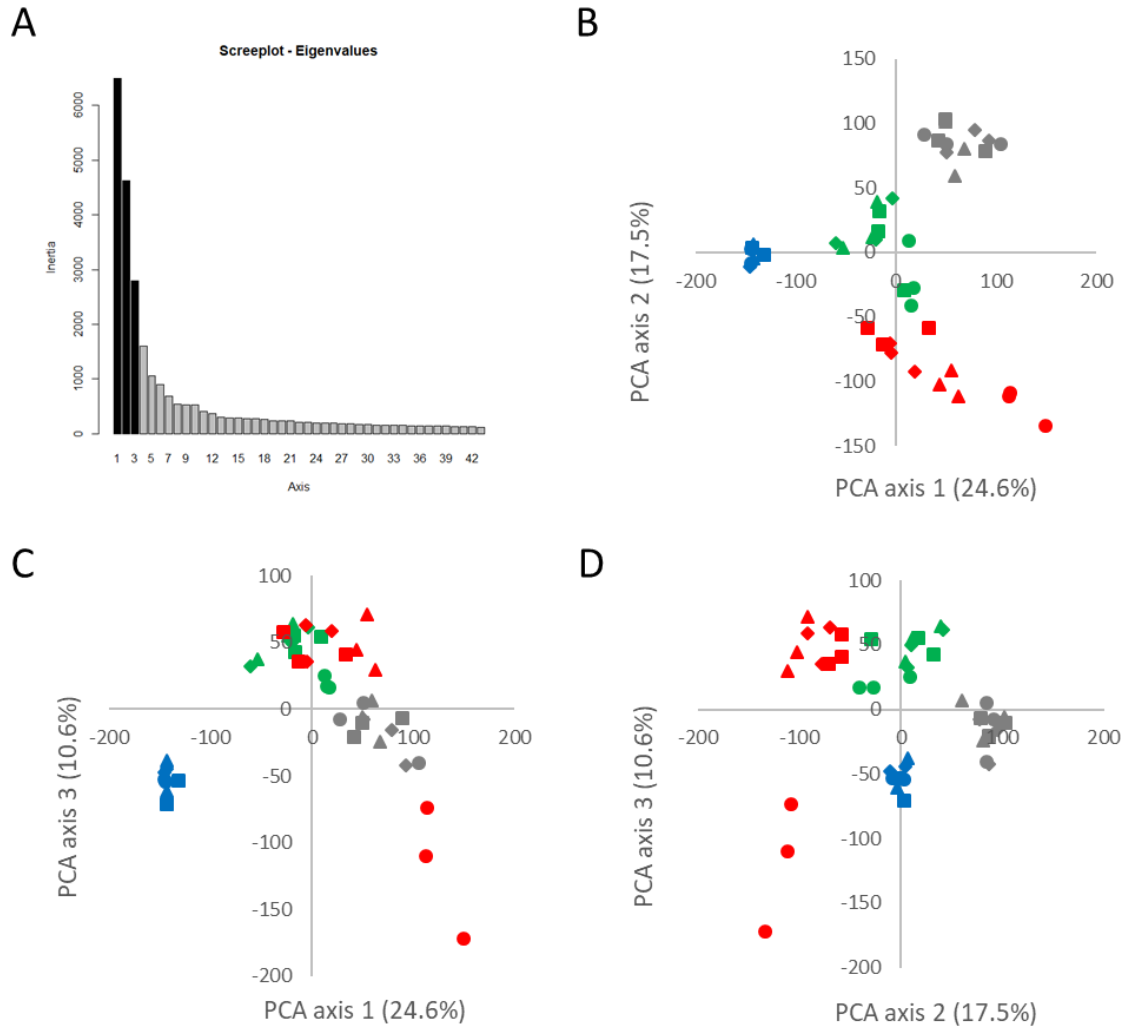

**Fig. S3.** Principal Component Analysis performed on the RNA-seq dataset of 33602 genes. (A) Eigenvalues distribution showing the relative importance of the Principal Components (PCs). (B) Plot of the PCA axis 1 vs the PCA axis 2. Each symbol indicates one genotype ( $\Delta$  correspond to Col-0 line,  $\diamond$  to *rks1-1* mutant,  $\square$  to *RKS1-si24* line and  $\circ$  is *RKS1-OE1*) and each timepoint is illustrated by a different color (blue for T0, grey for T1.5, green for T3 and red for T6). (C) Plot of the PCA axis 1 vs the PCA axis 3. (D) Plot of the PCA axis 2 vs the PCA axis 3. Values in brackets correspond to variance explained by each of the three PCs.

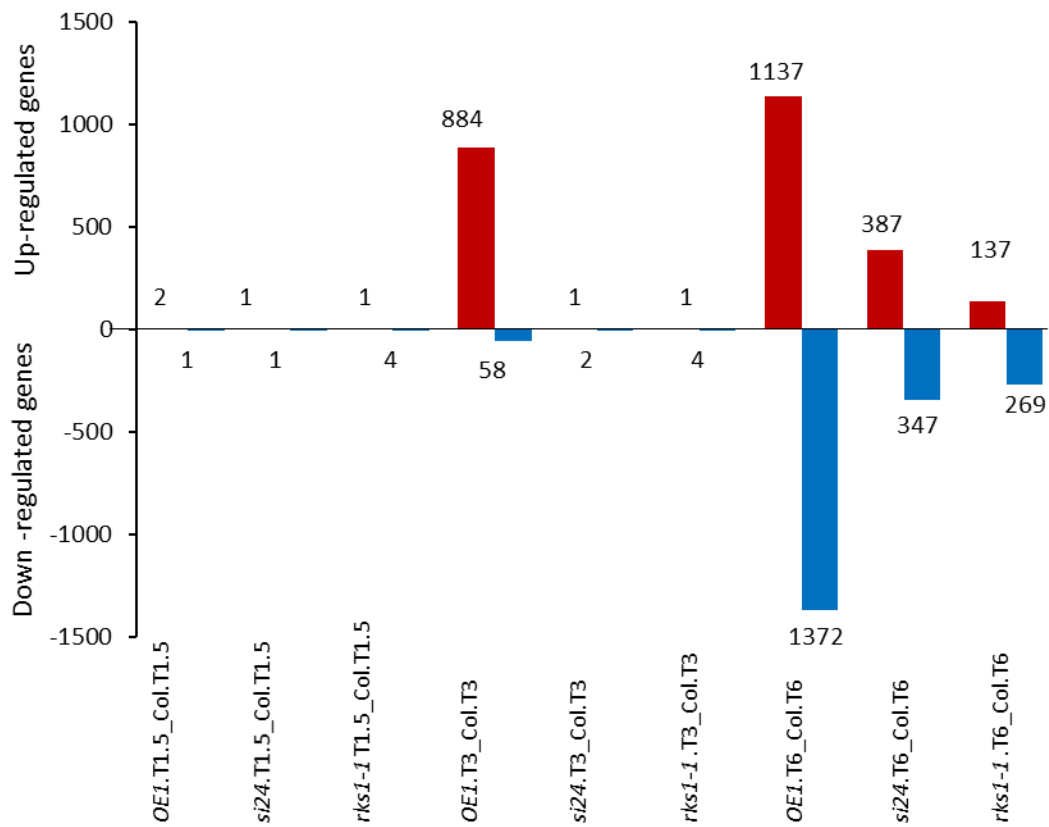

**Fig. S4.** Genes differentially expressed at different hours post-inoculation with *Xcc568* compared with those expressed in the wild type at the same time points. Red bars indicate up-regulated genes, blue bars indicate down-regulated genes.

**A**

| Class | Gene number per class | Number of genes tested by RT-qPCR | Number of genes validated * |                                                              |
|-------|-----------------------|-----------------------------------|-----------------------------|--------------------------------------------------------------|
|       |                       |                                   | RNA-seq material            | RNA-seq material + independent experiment + additional lines |
| UDD   | 55                    | 8                                 | 8                           | 6 - 7                                                        |
| ∅DD   | 117                   | 10                                | 9                           | 5                                                            |
| DUU   | 26                    | 9                                 | 6                           | 5 - 7                                                        |
| ∅UU   | 70                    | 7                                 | 4                           | 3                                                            |

\* Genes were considered as validated if expression profiles (determined by using a Wilcoxon statistical test performed on qPCR gene expression data) obtained by Quantitative RT-PCR analyses using RNA extracts from the samples from transcriptomic experiments (left column) or using an independent experiment and additional lines (right column) belonged to the same regulation class. Gene numbers indicated in the last column correspond to genes validated in the 6 *RKS1* lines (first number), or in 5/6 *RKS1* lines (second number).

**B**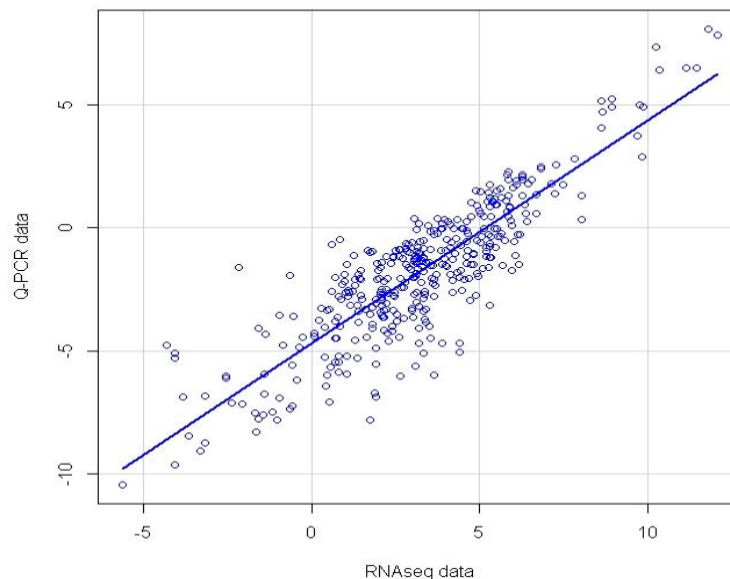

**Fig. S5.** Quantitative RT-PCR analysis of the expression profiles of genes belonging to the different regulation classes: UDD (Up-regulated in *RKS1-OE1* line, down regulated in *RKS1-si24* and in *rks1-1* lines), ∅DD (not affected in *RKS1-OE1* line, down regulated in *RKS1-si24* and in *rks1-1* lines), DUU (down-regulated in *RKS1-OE1* line, up-regulated in *RKS1-si24* and in *rks1-1* lines) and ∅UU (not affected in *RKS1-OE1* line, up-regulated in *RKS1-si24* and in *rks1-1* lines). (A) Number of genes validated as compared to the RNA-seq data (as described in \*). (B) Statistical relationship between RNA-seq data and RT-qPCR data obtained on 33 genes (3 values per line and 4 lines (Col-0, *RKS1-OE1*, *rks1-1* and *RKS1-si24*)) estimated by Pearson and Spearman correlation tests from R commander ( $p$ -value < 0.05). Coefficient of correlation of Pearson = 0.862987; coefficient of correlation of Spearman = 0.8231565.

GO-ID List X23 List X20 List XU0

| GO-ID   | Description - Biological Process                                         |
|---------|--------------------------------------------------------------------------|
| 9987    | cellular process                                                         |
| 50896   | response to stimulus                                                     |
| 42221   | response to chemical                                                     |
| 51716   | cellular response to stimulus                                            |
| 10038   | response to organic substance                                            |
| 70887   | cellular response to chemical stimulus                                   |
| 9719    | response to endogenous stimulus                                          |
| 9725    | response to hormone                                                      |
| 71210   | cellular response to organic substance                                   |
| 32870   | cellular response to hormone stimulus                                    |
| 71493   | cellular response to endogenous stimulus                                 |
| 10032   | response to inorganic substance                                          |
| 1901701 | cellular response to oxygen-containing compound                          |
| 10028   | response to metal ion                                                    |
| 46886   | response to cadmium ion                                                  |
| 9636    | response to toxic substance                                              |
| 98734   | detoxification                                                           |
| 48378   | chemical homeostasis                                                     |
| 50801   | ion homeostasis                                                          |
| 55080   | cation homeostasis                                                       |
| 71215   | cellular response to abiotic acid stimulus                               |
| 97906   | cellular response to alcohol                                             |
| 55065   | metal ion homeostasis                                                    |
| 72503   | cellular divalent inorganic cation homeostasis                           |
| 72507   | divalent inorganic cation homeostasis                                    |
| 30028   | cellular manganese ion homeostasis                                       |
| 32888   | response to insulin                                                      |
| 32889   | cellular response to insulin stimulus                                    |
| 43434   | response to peptide hormone                                              |
| 71375   | cellular response to peptide hormone stimulus                            |
| 1901892 | response to peptide                                                      |
| 1901893 | cellular response to peptide                                             |
| 17083   | response to insecticide                                                  |
| 46680   | response to DDT                                                          |
| 7154    | cell communication                                                       |
| 7185    | signal transduction                                                      |
| 22052   | signaling                                                                |
| 9793    | hormone-mediated signaling pathway                                       |
| 48583   | regulation of response to stimulus                                       |
| 7166    | cell surface receptor signaling pathway                                  |
| 7167    | enzyme linked receptor protein signaling pathway                         |
| 7178    | transmembrane receptor protein serine/threonine kinase signaling pathway |
| 80134   | regulation of response to stress                                         |
| 9888    | tissue development                                                       |
| 9966    | regulation of signal transduction                                        |
| 10946   | regulation of cell communication                                         |
| 23051   | regulation of signaling                                                  |
| 2831    | regulation of response to biotic stimulus                                |
| 9738    | abiotic acid-activated signaling pathway                                 |
| 9502    | regionalization                                                          |
| 7168    | transmembrane receptor protein tyrosine kinase signaling pathway         |
| 7389    | pattern specification process                                            |
| 43289   | regulation of ion transport                                              |
| 7264    | small GTPase mediated signal transduction                                |
| 2000070 | regulation of response to water deprivation                              |
| 80148   | negative regulation of response to water deprivation                     |
| 43068   | positive regulation of programmed cell death                             |
| 16043   | cellular component organization                                          |
| 16192   | vesicle-mediated transport                                               |
| 22807   | cellular component assembly                                              |
| 46907   | intracellular transport                                                  |
| 61024   | membrane organization                                                    |
| 34822   | cellular protein-containing complex assembly                             |
| 61023   | membrane fusion                                                          |
| 16050   | vesicle organization                                                     |
| 48284   | organelle fusion                                                         |
| 6906    | vesicle fusion                                                           |
| 32940   | secretion by cell                                                        |
| 48903   | secretion                                                                |
| 90174   | organelle membrane fusion                                                |
| 140392  | export from cell                                                         |
| 6887    | exocytosis                                                               |
| 32379   | regulation of localization                                               |
| 31048   | regulation of transport                                                  |
| 6888    | endoplasmic reticulum to Golgi vesicle-mediated transport                |
| 6914    | autophagy                                                                |
| 6997    | nucleus organization                                                     |
| 61918   | process utilizing autophagic mechanism                                   |
| 422     | autophagy of mitochondrion                                               |
| 43148   | proteasome assembly                                                      |
| 61728   | mitochondrion disassembly                                                |
| 1905008 | organelle disassembly                                                    |
| 32908   | endosome transport via multivesicular body sorting pathway               |
| 48268   | clathrin coat assembly                                                   |
| 71885   | multivesicular body sorting pathway                                      |
| 51179   | localization                                                             |
| 51214   | establishment of localization                                            |
| 6810    | transport                                                                |
| 71702   | organic substance transport                                              |
| 71703   | nitrogen compound transport                                              |
| 33036   | macromolecule localization                                               |
| 8104    | protein localization                                                     |
| 15031   | protein transport                                                        |
| 15833   | peptide transport                                                        |
| 42886   | amide transport                                                          |
| 43124   | establishment of protein localization                                    |
| 51641   | cellular localization                                                    |
| 55082   | transmembrane transport                                                  |
| 34613   | cellular protein localization                                            |
| 51649   | establishment of localization in cell                                    |
| 70727   | cellular macromolecule localization                                      |
| 6886    | intracellular protein transport                                          |
| 34220   | ion transmembrane transport                                              |
| 98650   | cation transmembrane transport                                           |
| 7024    | vesicular transport                                                      |
| 51129   | protein complex oligomerization                                          |
| 10541   | scroptelaxin transport                                                   |
| 8152    | metabolic process                                                        |
| 44237   | cellular metabolic process                                               |
| 19328   | protein metabolic process                                                |
| 6464    | cellular protein modification process                                    |
| 36211   | protein modification process                                             |
| 44267   | cellular protein metabolic process                                       |
| 9026    | cellular metabolic process                                               |
| 44248   | cellular metabolic process                                               |
| 6508    | proteolysis                                                              |
| 46777   | protein autophosphorylation                                              |
| 44269   | cellular macromolecule catabolic process                                 |
| 30163   | protein catabolic process                                                |
| 44257   | cellular protein catabolic process                                       |
| 51603   | proteolysis involved in cellular protein catabolic process               |
| 6311    | ubiquitin-dependent protein catabolic process                            |
| 19942   | modification-dependent protein catabolic process                         |
| 43822   | modification-dependent macromolecule catabolic process                   |
| 10488   | proteasomal protein catabolic process                                    |
| 9407    | toxin catabolic process                                                  |
| 10499   | proteasomal ubiquitin-independent protein catabolic process              |
| 10721   | protein glutathionylation                                                |
| 1901264 | organonitrogen compound metabolic process                                |
| 71704   | organic substance metabolic process                                      |
| 55114   | oxidation-reduction process                                              |
| 19748   | secondary metabolic process                                              |
| 5996    | monosaccharide metabolic process                                         |
| 51186   | cofactor metabolic process                                               |
| 9404    | toxin metabolic process                                                  |
| 6375    | cellular modified amino acid metabolic process                           |
| 6749    | glutathione metabolic process                                            |
| 9808    | lignin metabolic process                                                 |
| 97      | sulfur amino acid biosynthetic process                                   |
| 46364   | monosaccharide biosynthetic process                                      |
| 9223    | nucleotide-sugar metabolic process                                       |
| 9226    | nucleotide-sugar biosynthetic process                                    |
| 9809    | lignin biosynthetic process                                              |
| 19321   | pentose metabolic process                                                |
| 6335    | cysteine biosynthetic process from serine                                |
| 46482   | para-aminobenzoic acid metabolic process                                 |

Responses to stimuli

Cellular responses

Signaling and regulation of cellular process

Vesicle-mediated transport

Transport

Establishment of localization

Protein metabolism

Metabolism

Small molecule metabolism

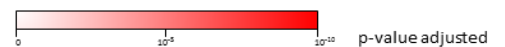

**Fig. S6.** Gene ontology analyses on the 268 co-regulated genes reveal multiple gene functional modules.

The analysis was conducted by using BINGO module from Cytoscape software. GO process annotation were recover for 232 genes and for genes down-regulated in *RKS1si24* and in *rks1-1* lines (XDD) and genes up-regulated in *RKS1-si24* and in *rks1-1* lines (XUU). The heatmap shows the overrepresentation significance ( $p$ -value $<0.05$ ) of GO biological process terms across the different classes. The lines highlight GO terms participating in same process.

**A**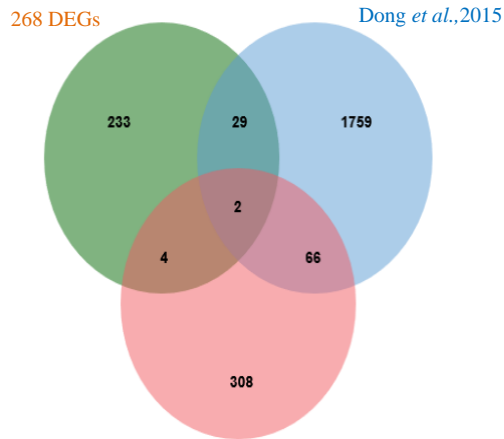**C**Hatsugai *et al.*, 2017

| 23 Common genes between the 268 DEGs and PTI genes |                           |
|----------------------------------------------------|---------------------------|
| Accession number                                   | Gene description          |
| AT5G44572                                          | Transmembrane protein     |
| AT1G74940                                          | DUF581                    |
| AT2G30740                                          | Protein kinase            |
| AT2G44210                                          | DUF239                    |
| AT5G61520                                          | Major facilitator protein |
| AT2G45920                                          | U-box protein             |
| AT3G03320                                          | RNA-binding protein       |
| AT2G47000                                          | ABCB4                     |
| AT4G00710                                          | BSK3                      |
| AT2G38170                                          | CAX1                      |
| AT1G75270                                          | DHAR2                     |
| AT5G54650                                          | Fh5                       |
| AT3G52930                                          | FBA8                      |
| AT4G14630                                          | GLP9                      |
| AT1G33240                                          | GTL1                      |
| AT4G32980                                          | ATH1                      |
| AT4G27730                                          | OPT6                      |
| AT1G65390                                          | PP2-A5                    |
| AT3G45780                                          | PHOT1                     |
| AT3G11330                                          | PIRL9                     |
| AT5G47200                                          | RAB1A                     |
| AT5G07250                                          | RBL3                      |
| AT3G04670                                          | WRKY39                    |

**B**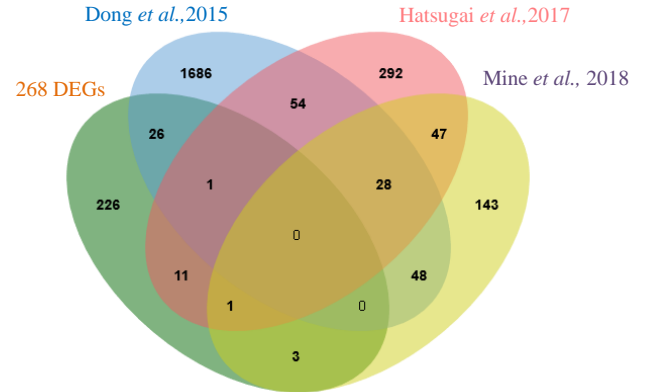

| 30 Common genes between the 268 DEGs and ETI genes |                          |
|----------------------------------------------------|--------------------------|
| Accession number                                   | Gene description         |
| AT5G01380                                          | Homeodomain-like protein |
| AT4G26470                                          | EF-hand protein          |
| AT1G24350                                          | Acid phosphatase         |
| AT4G37030                                          | Membrane protein         |
| AT5G64850                                          | sorbin/SH3 protein       |
| AT2G29670                                          | TPR-like protein         |
| AT5G07910                                          | LRR protein              |
| AT2G18193                                          | Hydrolase protein        |
| AT5G62890                                          | Xanthine permease        |
| AT1G70490                                          | ARFA1D                   |
| AT5G63880                                          | VPS20.1                  |
| AT1G66600                                          | WRKY63                   |
| AT5G20910                                          | AIP2                     |
| AT2G22470                                          | AGP2                     |
| AT5G11520                                          | ASP3                     |
| AT4G21980                                          | G8A                      |
| AT2G32210                                          | HCYSTM6                  |
| AT2G30770                                          | CYP71A13                 |
| AT2G34500                                          | CYP710A1                 |
| AT3G12620                                          | PP2C.D3                  |
| AT2G30550                                          | DALL3                    |
| AT2G31570                                          | GPX2                     |
| AT1G78380                                          | GSTU19                   |
| AT2G29460                                          | GSTU4                    |
| AT5G02780                                          | GSTL1                    |
| AT3G17420                                          | GPK1                     |
| AT4G32190                                          | PII1                     |
| AT4G18205                                          | PUP21                    |
| AT5G14420                                          | RGLG2                    |
| AT5G11390                                          | WIT1                     |

| 12 Common genes between the 268 DEGs, and PTI and ETI gene lists |                        |
|------------------------------------------------------------------|------------------------|
| Accession number                                                 | Gene description       |
| AT2G29320                                                        | NAD(P)-binding protein |
| AT2G44380                                                        | Cys/His-rich protein   |
| AT3G57090                                                        | BIGYIN                 |
| AT2G45770                                                        | CPFTSY                 |
| AT3G48740                                                        | SWEET11                |
| AT4G22710                                                        | CYP706A2               |
| AT2G47730                                                        | GSTF8                  |
| AT4G39050                                                        | KIN7.4                 |
| AT1G65610                                                        | KOR2                   |
| AT2G38360                                                        | PRA1.B4                |
| AT4G25230                                                        | RIN2                   |
| AT2G15480                                                        | UGT73B5                |

**Fig. S7.** Identification within the 268 DEGs of genes previously associated with gene networks of PTI or ETI immune responses (Dong *et al.*, 2015; Hatsugai *et al.*, 2017; Mine *et al.*, 2018). Venn diagrams established with the 268 DEGs identified in this study and (A) the PTI genes and (B) the

ETI genes previously identified. (C) Accession numbers and description of genes found in common between the 268 DEGs identified in this study and the PTI (left), ETI (center) and PTI and ETI (right) genes.



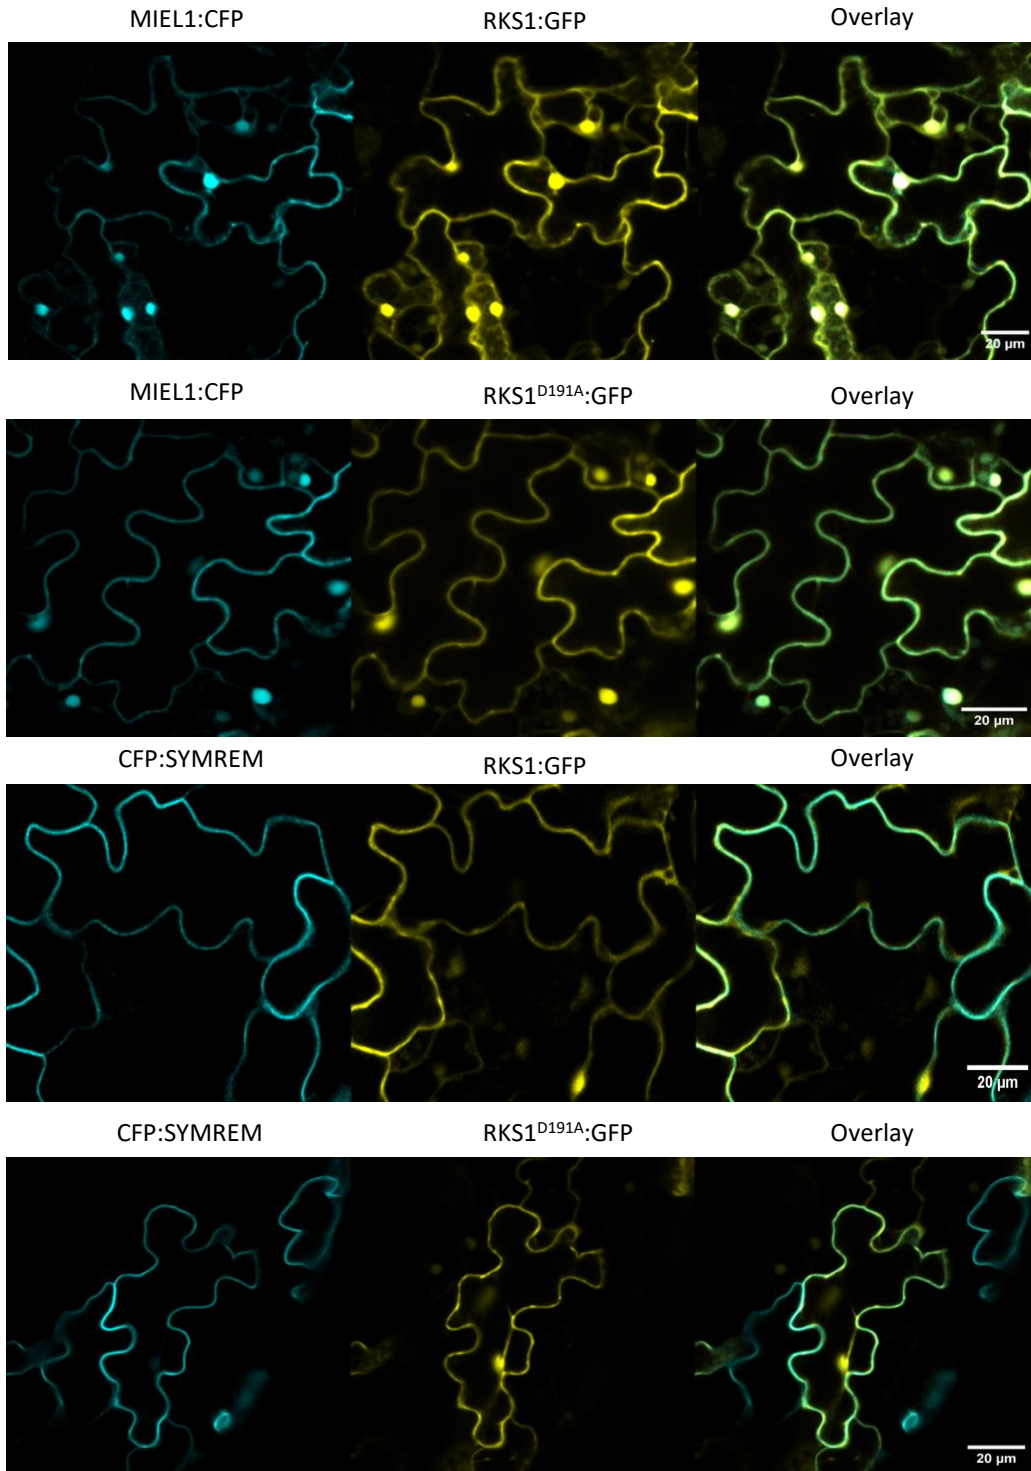

**Fig. S8.** RKS1 localizes in the nucleus, the cytoplasm and the plasma membrane. Confocal images of epidermal cells of Arabidopsis seedlings 72 h after Agrobacterium mediated transient expression of the indicated constructs. We used RKS1 and a mutated version of RKS1 (RKS1<sup>D191A</sup>) fused to the GFP. MIEL1:CFP was used as a subcellular marker of the cytoplasm and nucleus of Arabidopsis cells (6), CFP:MtSYMREM as a subcellular marker of the plasma membrane (7). Co-localization of RKS1 or the mutated version of RKS1 with the two subcellular markers is shown in the merge panel (right). Scale bars= 20μM.

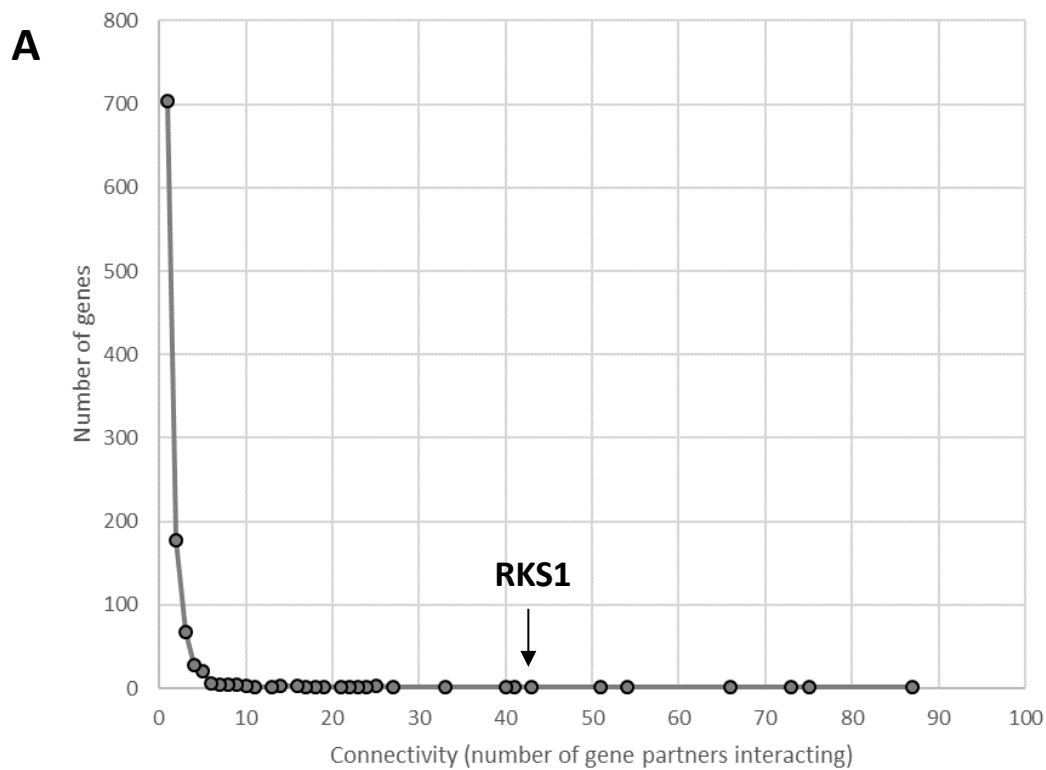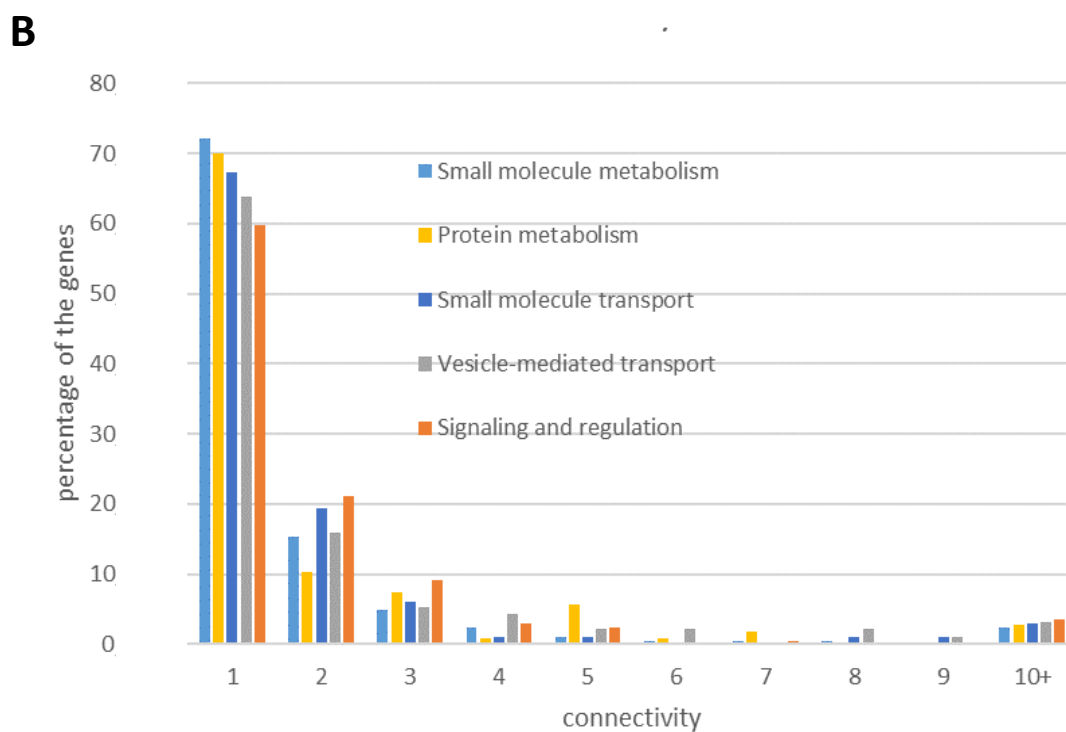

**Fig. S9.** Analysis of the network connectivity. (A) Number of genes by connectivity. RKS1 is the 7th top hub in the network with 44 connections. (B) Percentage of the genes by connectivity distributed in the 5 functional groups.

**A**

| Gene      | mutants lines | Disease index 3dpi | Disease index 5dpi | Disease index 7dpi | Disease index 10dpi | Phenotype Class | T-DNA insertion localisation | T-DNA genome insertion site | Gene Expression Estimation |
|-----------|---------------|--------------------|--------------------|--------------------|---------------------|-----------------|------------------------------|-----------------------------|----------------------------|
| AT1G05785 | 170           | 0                  | 0.19               | 0.42               | 1.00                | WT              | 3'UTR                        | Chr1_1732442                | +                          |
| AT1G52540 | 134           | 0                  | 0.08               | 0.25               | 0.96                | R               | 5'UTR                        | Chr1_19571727               | +                          |
|           | 85            | 0                  | 0.64               | 1.36               | 2.31                | S               | 5'UTR                        | Chr1_20105934               | +                          |
|           | 128           | 0                  | 0.20               | 0.57               | 0.92                | WT              | ORF                          | Chr1_20104861               | +                          |
| AT1G53850 | 129           | 0                  | 0.03               | 0.57               | 0.89                | WT              | upstream 5'UTR               | Chr1_20106174               | +                          |
| AT1G67070 | 26            | 0                  | 0                  | 0.58               | 1.71                | WT              | ORF                          | Chr1_24997945               | -                          |
|           | 111           | 0                  | 0.29               | 0.90               | 1.67                | S               | 5'UTR                        | Chr1_24995969               | -                          |
| AT1G69790 | 130           | 0                  | 0.38               | 0.98               | 1.57                | S               | 5'UTR                        | Chr1_26266784               | -                          |
|           | 131           | 0                  | 0.28               | 0.69               | 1.23                | S               | ORF                          | Chr1_26266204               | -                          |
| AT1G78380 | 98            | 0                  | 0.57               | 1.08               | 1.82                | S               | 3'UTR                        | Chr1_29464359               | -                          |
| AT2G24850 | tat3-1        | 0                  | 0.37               | 0.54               | 1.35                | WT              | ORF                          | Chr2_10583243               | ++                         |
| AT2G26410 | 191           | 0                  | 0.28               | 0.44               | 1.00                | WT              | ORF                          | Chr2_11235597               | (-)                        |
|           | 88            | 0                  | 0.34               | 1.00               | 1.71                | S               | 3'UTR                        | Chr2_13444417               | -                          |
|           | 121           | 0                  | 0.49               | 0.98               | 1.63                | S               | 5'UTR                        | Chr2_13448374               | -                          |
|           | 77            | 0                  | 0.36               | 0.83               | 1.46                | S               | ORF                          | Chr2_13445725               | -                          |
| AT2G36020 | 109           | 0                  | 0.18               | 0.73               | 1.35                | S               | ORF                          | Chr2_14833120               | -                          |
| AT2G43490 | 169           | 0                  | 1.11               | 1.74               | 2.30                | S               | ORF                          | Chr2_18056144               | -                          |
|           | 168           | 0                  | 0.48               | 0.83               | 1.35                | WT              | ORF                          | Chr2_18057293               | +                          |
| AT3G01650 | 75            | 0                  | 0.47               | 1.08               | 1.73                | S               | ORF                          | Chr3_240740                 | -                          |
|           | 76            | 0                  | 0.04               | 0.57               | 1.07                | WT              | 5'UTR                        | Chr3_232307                 | -                          |
| AT3G05710 | 163           | 0                  | 0.33               | 0.65               | 1.25                | S               | ORF                          | Chr3_1686286                | =                          |
|           | 103           | 0                  | 0.61               | 1.09               | 1.87                | S               | ORF                          | Chr3_2373436                | -                          |
| AT3G07370 | 78            | 0                  | 0.46               | 1.05               | 1.76                | S               | ORF                          | Chr3_2373693                | -                          |
|           | 54            | 0                  | 0.25               | 0.40               | 1.15                | WT              | 5'UTR                        | Chr3_2375359                | =                          |
| AT3G12620 | 144           | 0                  | 0.02               | 0.21               | 1.08                | R               | ORF                          | Chr3_4009571                | -                          |
|           | 145           | 0                  | 0.12               | 0.35               | 0.98                | R               | ORF                          | Chr3_4010068                | -                          |
| AT3G13235 | 183           | 0                  | 0.19               | 0.50               | 1.08                | S/WT            | ORF                          | Chr3_4272731                | -                          |
| AT3G15980 | 173           | 0                  | 0.38               | 0.69               | 1.88                | S               | ORF                          | Chr3_5415270                | -                          |
| AT3G17420 | 141           | 0                  | 0.25               | 0.40               | 0.96                | WT              | ORF                          | Chr3_5960762                | -                          |
| AT3G19230 | 139           | 0                  | 0.14               | 0.31               | 0.69                | R               | ORF                          | Chr3_6661716                | -                          |
|           | 100           | 0                  | 0.92               | 1.69               | 2.37                | S               | ORF                          | Chr3_9615183                | -                          |
| AT3G26340 | 105           | 0                  | 0.39               | 0.93               | 1.56                | S               | 5'UTR                        | Chr3_9615855                | +                          |
| AT3G54300 | 154           | 0                  | 0.19               | 0.11               | 0.52                | R               | upstream 5'UTR               | Chr3_20110528               | -                          |
|           | 101           | 0                  | 0.32               | 0.68               | 1.79                | S               | 3'UTR                        | Chr3_20740664               | =                          |
|           | 115           | 0                  | 0.09               | 0.51               | 1.19                | WT              | ORF                          | Chr3_20740462               | -                          |
| AT3G59110 | 132           | 0                  | 0.29               | 0.58               | 1.19                | S               | ORF                          | Chr3_21856602               | -                          |
|           | 133           | 0                  | 0.19               | 0.33               | 0.92                | WT              | ORF                          | Chr3_21857573               | =                          |
| AT4G00710 | 195           | 0                  | 0.23               | 0.88               | 1.77                | S               | 5'UTR                        | Chr4_320461                 | -                          |
|           | 194           | 0                  | 0.05               | 0.43               | 0.95                | WT              | 5'UTR                        | Chr4_290458                 | -                          |
| AT4G01960 | 104           | 0                  | 0.56               | 1.19               | 1.83                | S               | 5'UTR                        | Chr4_869623                 | =                          |
|           | 102           | 0                  | 0.31               | 0.84               | 1.25                | S               | 5'UTR                        | Chr4_853159                 | -                          |
|           | 55            | 0                  | 0.20               | 0.85               | 1.79                | S               | 3'UTR                        | Chr4_7436195                | -                          |
| AT4G12120 | 61            | 0                  | 0.05               | 0.46               | 1.15                | WT              | ORF                          | Chr4_7439099                | =                          |
| AT4G15780 | 151           | 0                  | 0.35               | 0.57               | 1.24                | WT              | 5'UTR                        | Chr4_8981597                | +                          |
|           | 152           | 0                  | 0.23               | 0.62               | 1.07                | WT              | ORF                          | Chr4_8979601                | +                          |
| AT4G19006 | 187           | 0                  | 0.38               | 0.54               | 1.46                | WT              | ORF                          | Chr4_10410105               | =                          |
|           | 72            | 0                  | 0.45               | 1.30               | 1.95                | S               | ORF                          | Chr4_10695490               | +                          |
| AT4G19040 | 86            | 0                  | 0.29               | 0.69               | 1.46                | S               | ORF                          | Chr4_10435374               | +                          |
|           | 80            | 0                  | 0.38               | 0.92               | 1.34                | S               | ORF                          | Chr4_10435951               | +                          |
|           | 114           | 0                  | 0.11               | 0.25               | 0.79                | R               | 5'UTR                        | Chr4_10437913               | -                          |
| AT4G19170 | 107           | 0                  | 0.29               | 0.58               | 1.30                | S               | ORF                          | Chr4_10483036               | -                          |
| AT4G30260 | 164           | 0                  | 0.40               | 0.52               | 1.31                | WT              | 5'UTR                        | Chr4_14818697               | =                          |
|           | 165           | 0                  | 0.19               | 0.33               | 1.19                | WT              | ORF                          | Chr4_14816938               | =                          |
| AT5G02320 | 12            | 0                  | 0.06               | 0.42               | 1.19                | R               | ORF                          | Chr5_469574                 | -                          |
| AT5G07180 | 146           | 0                  | 0.06               | 0.28               | 1.14                | R               | ORF                          | Chr5_2230477                | -                          |
|           | 147           | 0                  | 0.08               | 0.28               | 0.98                | R               | ORF                          | Chr5_2231242                | -                          |
|           | 148           | 0                  | 0.08               | 0.19               | 0.96                | R               | ORF                          | Chr5_2228526                | -                          |
| AT5G11610 | 110           | 0                  | 0.39               | 0.88               | 1.60                | S               | 3'UTR                        | Chr5_3747502                | -                          |
|           | 112           | 0                  | 0.41               | 0.84               | 1.42                | S               | 3'UTR                        | Chr5_3747577                | =                          |
|           | 96            | 0                  | 0.68               | 1.31               | 2.00                | S               | ORF                          | Chr5_4657392                | -                          |
| AT5G14420 | 122           | 0                  | 0.31               | 0.46               | 0.98                | WT              | ORF                          | Chr5_4650498                | -                          |
|           | 123           | 0                  | 0.14               | 0.38               | 0.70                | R               | ORF                          | Chr5_4648653                | -                          |
| AT5G20480 | 149           | 0                  | 0.04               | 0.25               | 0.94                | R               | ORF                          | Chr5_6924648                | -                          |
| AT5G23540 | 179           | 0                  | 0.13               | 0.40               | 1.23                | R               | 3'UTR                        | Chr5_7937377                | +                          |
|           | 89            | 0                  | 0.45               | 1.20               | 2.17                | S               | ORF                          | Chr5_10053642               | -                          |
|           | 83            | 0                  | 0.58               | 1.00               | 1.68                | S               | ORF                          | Chr5_10053872               | -                          |
|           | 22            | 0                  | 0.29               | 0.87               | 1.58                | S               | ORF                          | Chr5_10107148               | -                          |
| AT5G44190 | 190           | 0                  | 0.38               | 0.52               | 1.13                | WT              | ORF                          | Chr5_17800212               | -                          |
| AT5G47200 | 156           | 0                  | 0.33               | 0.64               | 1.19                | WT              | ORF                          | Chr5_19166902               | -                          |
|           | 81            | 0                  | 0.30               | 0.96               | 1.91                | S               | ORF                          | Chr5_26716016               | -                          |
| AT5G67600 | 113           | 0                  | 0.06               | 0.25               | 0.71                | R               | upstream 5'UTR               | Chr5_26717084               | +                          |
| NA        | Col-0         | 0                  | 0.20               | 0.51               | 1.03                |                 |                              |                             |                            |
| AT3G57710 | rks1-1        | 0                  | 1.02               | 1.83               | 2.56                |                 |                              |                             |                            |

**B**

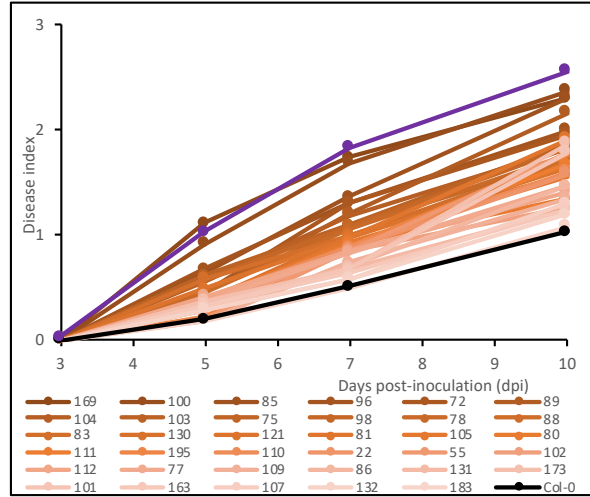

**C**

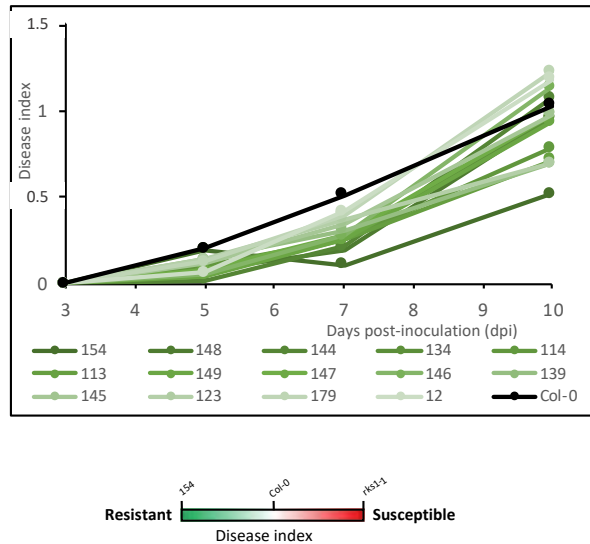

**Fig. S10. Molecular and phenotypic analysis of insertional mutants corresponding to genes belonging to functional modules of the *RKS1* dependent network.**

(A) Mutant lines, corresponding gene accessions and mutant phenotypes after inoculation with a bacterial suspension of *Xcc568* adjusted to  $2.10^8$  cfu/mL. A heatmap highlights time course evaluation of mutant disease index as compared to the wild type (Col-0) disease index. Disease symptoms were observed on leaves of mutant and wild-type plants at 3, 5, 7 and 10 days post-inoculation (dpi). Means were calculated from 4–24 plants. Green represents disease index significantly reduced as compared to Col-0 (more resistant), Red represents disease index

significantly increased as compared to Col-0 (more susceptible) and white, not significantly different from Col-0. P-value numbers represent kinetic modeling deference with Col-0, 0 = p-value>0.05 and 1= p-value<= 0.05. The phenotype is indicated as R (resistant), S (susceptible) or WT (not significantly different from Col-0). For each mutant, location of the T-DNA insertion was determined by sequencing and indicated (5'UTR, ORF or 3'UTR regions, T-DNA genome insertion site). Gene expression was evaluated by RT-qPCR in the mutant plants, and indicated as + (increased in the mutant as compared to Col-0), - (decreased in the mutant as compared to Col-0) and by = (not affected in the mutant as compared to Col-0) in the last column. Statistical analysis was performed by comparing the kinetic of the average disease index of each mutant to the kinematic of the average disease index of Col-0 (see Material and Methods section) and \* indicates that gene expression is significantly different in the mutant as compared to Col-0 (p-value  $\leq$  0.05). RT-qPCR was performed with primers downstream the T-DNA insertion except for mutants mentioned by <sup>a</sup>. (B and C) Time course evaluation of mutant phenotype in response to inoculation with *Xcc*, according to their "phenotype class" susceptible (B) or resistant (C). *rks1-1* phenotype is represented in purple.

A

| Line                        | Disease index |       |       |        | Standard deviations |       |       |        | nb_exp | nb_plants | Diff | Intercept | iLCI   | iUCI  | Slope | sLCI  | sUCI  |
|-----------------------------|---------------|-------|-------|--------|---------------------|-------|-------|--------|--------|-----------|------|-----------|--------|-------|-------|-------|-------|
|                             | 3 dpi         | 5 dpi | 7 dpi | 10 dpi | 3 dpi               | 5 dpi | 7 dpi | 10 dpi |        |           |      |           |        |       |       |       |       |
| <i>dde2-2</i>               | 0             | 0     | 0     | 0.45   | 0                   | 0     | 0     | 0.1    | 2      | 10        | 1    | 3.30      | 2.69   | 3.91  | -0.34 | -0.61 | -0.08 |
| <i>ein2-1</i>               | 0             | 0     | 0.07  | 0.21   | 0                   | 0     | 0     | 0.1    | 3      | 18        | 1    | 0         | 0      | 0     | 0.50  | 0.39  | 0.61  |
| <i>pad4-1</i>               | 0             | 0.03  | 0.12  | 0.24   | 0                   | 0     | 0     | 0.1    | 3      | 19        | 1    | -1.82     | -2.46  | -1.18 | 1.34  | 1.05  | 1.62  |
| <i>sid2-2</i>               | 0             | 0.01  | 0.12  | 0.43   | 0                   | 0     | 0     | 0.1    | 3      | 19        | 0    | 0         | 0      | 0     | 1.03  | 0.94  | 1.12  |
| <i>dde2-2/ein2-1</i>        | 0             | 0     | 0.05  | 0.10   | 0                   | 0     | 0     | 0.0    | 2      | 10        | 1    | 0         | 0      | 0     | 0.24  | 0.11  | 0.36  |
| <i>dde2-2/sid2-2</i>        | 0             | 0.05  | 0.41  | 0.82   | 0                   | 0     | 0.1   | 0.1    | 2      | 11        | 0    | 0         | 0      | 0     | 1.92  | 0.96  | 2.88  |
| <i>dde2-2/pad4-1</i>        | 0             | 0     | 0.05  | 0.22   | 0                   | 0     | 0     | 0.1    | 3      | 15        | 1    | 0         | 0      | 0     | 0.52  | 0.46  | 0.58  |
| <i>ein2-1/pad4-1</i>        | 0             | 0.02  | 0.06  | 0.24   | 0                   | 0     | 0     | 0.1    | 3      | 18        | 1    | 0         | 0      | 0     | 0.57  | 0.54  | 0.60  |
| <i>dde2-2/ein2-1/sid2-2</i> | 0             | 0     | 0.03  | 0.10   | 0                   | 0     | 0     | 0.0    | 2      | 10        | 1    | 0         | 0      | 0     | 0.24  | 0.21  | 0.27  |
| <i>dde2-2/ein2-1/pad4-1</i> | 0             | 0     | 0     | 0.13   | 0                   | 0     | 0     | 0.0    | 2      | 10        | 1    | 0.92      | 0.75   | 1.09  | -0.10 | -0.17 | -0.02 |
| <i>dde2-2/pad4-1/sid2-2</i> | 0             | 0     | 0     | 0.15   | 0                   | 0     | 0     | 0.0    | 2      | 10        | 1    | 1.10      | 0.90   | 1.30  | -0.11 | -0.20 | -0.03 |
| <i>ein2-1/pad4-1/sid2-2</i> | 0             | 0     | 0     | 0.08   | 0                   | 0     | 0     | 0.0    | 2      | 10        | 1    | 0.55      | 0.45   | 0.65  | -0.06 | -0.10 | -0.01 |
| quadruple                   | 0             | 0     | 0     | 0.05   | 0                   | 0     | 0     | 0.0    | 2      | 11        | 1    | 0.33      | 0.27   | 0.39  | -0.03 | -0.06 | -0.01 |
| Col-0                       | 0             | 0.03  | 0.10  | 0.42   | 0                   | 0     | 0     | 0.1    | 3      | 29        |      |           |        |       |       |       |       |
| <i>rks1-1</i>               | 0             | 0.26  | 0.69  | 1.73   | 0                   | 0.1   | 0.2   | 0.2    | 3      | 32        | 1    | -8.20     | -14.66 | -1.74 | 7.50  | 4.66  | 10.34 |
| <i>Kas-1</i>                | 0             | 0.65  | 1.60  | 2.87   | 0                   | 0.1   | 0.2   | 0.2    | 3      | 15        | 1    | -27.47    | -45.60 | -9.33 | 18.28 | 10.30 | 26.26 |

B

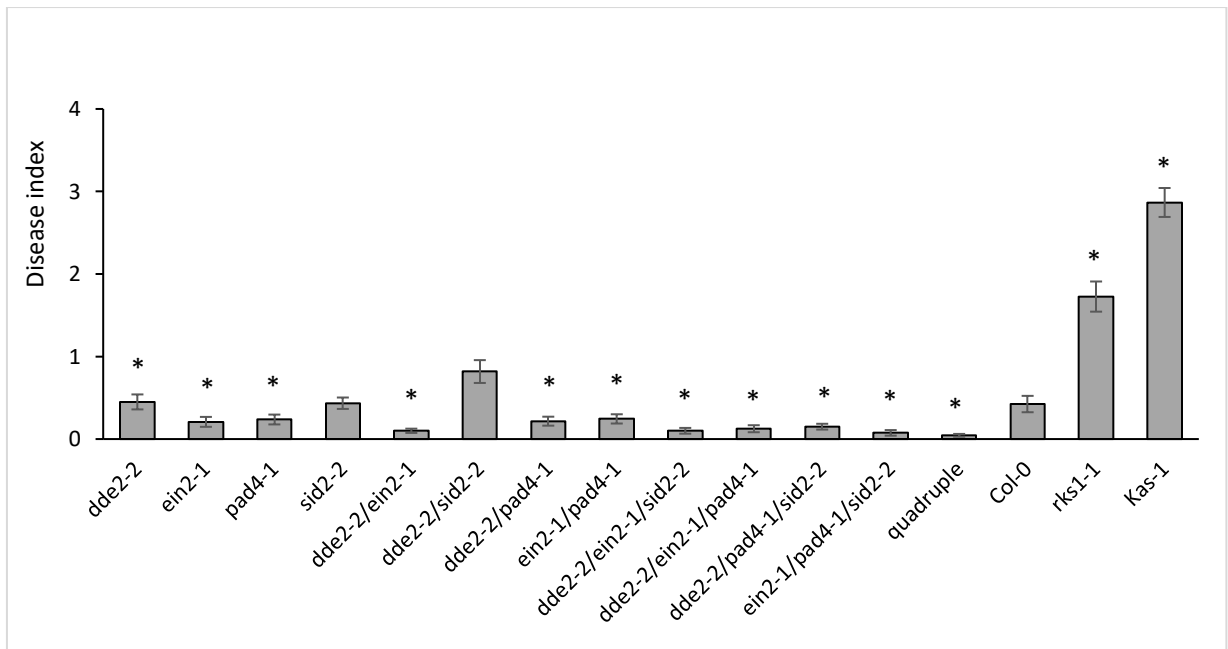

**Fig. S11.** Analysis of mutant lines described to impair PTI/ETI networks in response to *Xcc568*. (A) Disease index at 3, 5, 7 and 10 days post-inoculation and statistical data. (B) Evaluation of disease index 10 dpi after inoculation with a bacterial suspension adjusted to  $2.10^8$  cfu/mL. Means and standard errors were calculated from 10-32 plants in two or three independent experiments. \* represent kinematic modeling deference with Col-0 time course. 0 = p-value > 0.05 and 1 = p-value = 0.05.

**A**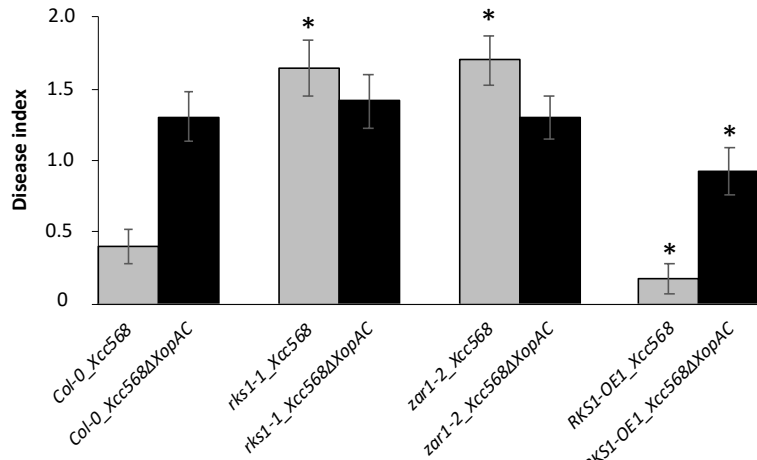**B**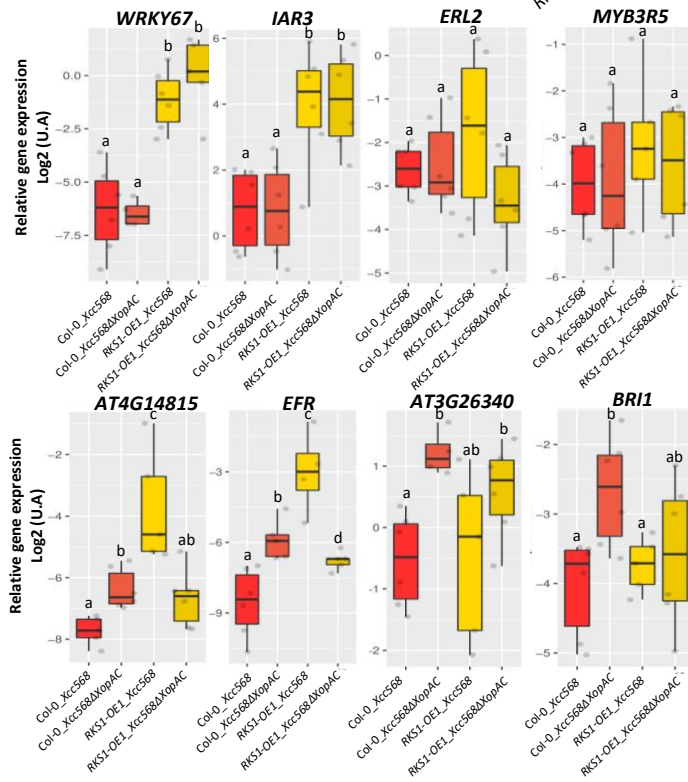**C**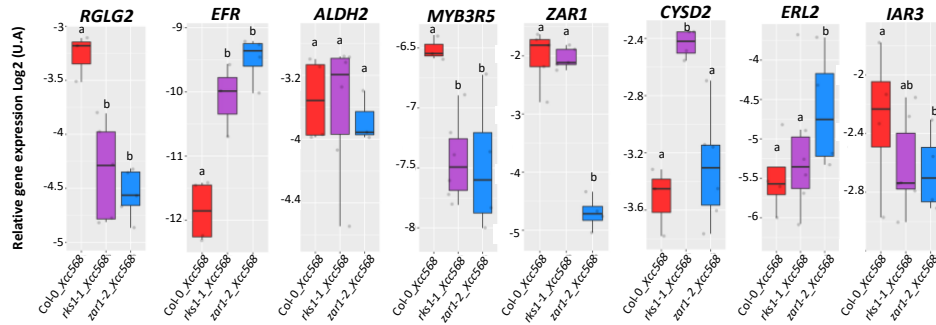

**Fig. S12.** Analysis of resistance phenotypes of *RKS1* mutant or transgenic lines and of DEG expression profiles in response to *Xcc568* and *Xcc568ΔXopAC*. (A) Disease index at 7 dpi after inoculation of *rks1-1*, *zar1-2*, *RKS1-OE1* and the wild-type accession Col-0 with a bacterial suspension of *Xcc568* or *Xcc568ΔXopAC* strains adjusted to  $2.10^8$  cfu/mL. Means were calculated from 8–10 plants on 2 independent experiments. \* represents kinetic modeling deference with the corresponding Col-0 (Col-0\_ *Xcc568* or Col-0\_ *Xcc568ΔXopAC*) time course, \* = p-value ≤ 0.05. (B) Analysis by quantitative RT-PCR of the expression profile for 8 specific genes, 6 hours after inoculation in *RKS1-OE1* and the WT leaves inoculated with *Xcc568* or *Xcc568ΔXopAC* ( $2.10^8$  cfu/mL). Each gene corresponds to a DEG expression class or *RKS1* network component: *WRKY67* and *IAR3* (class UDD), *ERL2* (∅UU class), *MYB3R5* (∅DD class), *AT4G14815*, *AT3G26340* and *BRI1* as components of the *RKS1* dependent network, *EFR* as Yeast Two Hybrid candidate. The 4 genes *WRKY67*, *IAR3*, *ERL2* and *MYB3R5* present a *XopAC* expression profile independent of the presence of *XopAC*, while *AT4G14815*, *EFR*, *AT3G26340* and *BRI1* exhibit a *XopAC*-dependent expression profile. Statistical groups were generated with the Wilcoxon test, based on 6 plants/strain/line. (C) Analysis by quantitative RT-PCR of the expression profile for 8 specific genes, 6 hours after inoculation in Col-0, *rks1-1* and *zar1-2* inoculated with *Xcc568* ( $2.10^8$  cfu/mL). Each gene corresponds to a DEG expression class or *RKS1* network component: *IAR3* (class UDD), *CYSD2* and *ERL2* (∅UU class), *RGLG2* and *MYB3R5* (∅DD class), *ALDH2* and *ZAR1* as components of the *RKS1* dependent network, *EFR* as a Yeast Two Hybrid candidate. Statistical groups were generated with the Wilcoxon test, based on 6 plants/strain/line.

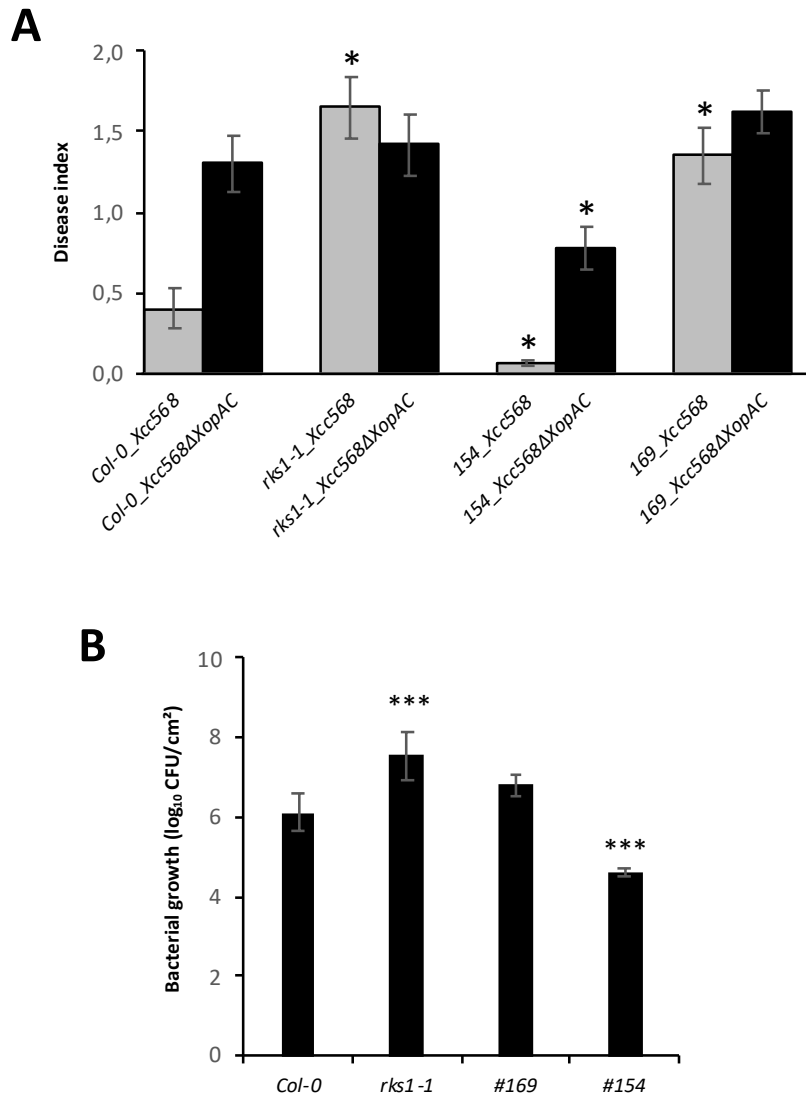

**Fig. S13.** Analysis of resistance phenotypes of two mutants corresponding to genes of the RKS1-dependent network in response to *Xcc568* and *Xcc568ΔXopAC*. (A) Disease index of *rks1-1*, 154, 169 mutants and the WT at 7 dpi with a bacterial suspension of *Xcc568* or *Xcc568ΔXopAC* ( $2 \cdot 10^8$  cfu/mL). Data were collected from three independent experiments. Means were calculated from 8–10 plants on 2 independent experiments. \* represents kinetic modeling deference with the corresponding Col-0 (*Col-0\_Xcc568* or *Col-0\_Xcc568ΔXopAC*) time course, \* =  $p\text{-value} \leq 0.05$ . (B) Bacterial growth measurement in leaves of the WT and the mutants *rks1-1*, 154 and 169. Bacterial growth has been measured 7 dpi with *Xcc568* at distance from the inoculation zone (at the tip of the inoculated leaves) with a bacterial suspension adjusted to  $2 \cdot 10^8$  CFU/mL. Data were collected from three independent experiments, each timepoint corresponds to measurements on 3–5 individual plants (four leaves/plant). Statistical analysis was performed using the parametric test ANOVA and bacterial growth of Col-0 at day 0 as reference.



**Table S1.** Effects of genetic line and time on global change of expression across the genome. (A) Complete model. Var Expl : variance explained by each model term (expressed in percent). (B) Reduced model for each time point.

| <b>A</b>    | PCA axis 1 (24.6%) |         |      | PCA axis 2 (17.5%) |         |      | PCA axis 3 (10.6%) |         |      |
|-------------|--------------------|---------|------|--------------------|---------|------|--------------------|---------|------|
|             | Terms              | F       | P    | Var Expl (%)       | F       | P    | Var Expl (%)       | F       | P    |
| Line        | 7.8                | 6.1E-04 | 0.9  | 3.9                | 1.9E-02 | 1.0  | 18.1               | 1.0E-06 | 6.9  |
| Time        | 185.0              | 1.5E-18 | 86.5 | 237.4              | 5.2E-20 | 92.5 | 42.7               | 1.4E-10 | 36.1 |
| Line * Time | 6.2                | 8.2E-05 | 8.3  | 2.0                | 7.9E-02 | 1.8  | 12.5               | 1.1E-07 | 45.8 |

| <b>B</b> | PCA axis 1 (24.6%) |               | PCA axis 2 (17.5%) |               | PCA axis 3 (10.6%) |               |
|----------|--------------------|---------------|--------------------|---------------|--------------------|---------------|
|          | Time               | F             | P                  | F             | P                  | F             |
| T0       | 1.23               | 0.4075        | 0.15               | 0.9262        | 0.91               | 0.5114        |
| T1.5     | 0.22               | 0.8772        | 0.24               | 0.8628        | 0.36               | 0.7836        |
| T3       | 3.87               | 0.0559        | 1.67               | 0.2501        | 5.95               | <b>0.0195</b> |
| T6       | 24.14              | <b>0.0002</b> | 14.79              | <b>0.0013</b> | 25.59              | <b>0.0002</b> |

**Table S2.** A list of candidate genes identified by Yeast Two-Hybrid screening (2 rounds) using RKS1<sup>D191A</sup> as bait and cDNAs generated from mRNA isolated from Arabidopsis leaves infected with Xcc (strain 147) as prey, including their accession number or gene description (TAIR10), the known symbol and hit number.

| Accession number | Primary Gene Symbol / Gene description                               | Hit number |
|------------------|----------------------------------------------------------------------|------------|
| AT1G09070        | SOYBEAN GENE REGULATED BY COLD-2 (SRC2)                              | 2          |
| AT1G12900        | GLYCERALDEHYDE 3-PHOSPHATE DEHYDROGENASE A SUBUNIT 2 (GAPA-2)        | 1          |
| AT1G17100        | HAEM-BINDING PROTEIN 1 (HBP1)                                        | 1          |
| AT1G58180        | BETA CARBONIC ANHYDRASE 6 (BCA6)                                     | 2          |
| AT1G66160        | "CYS, MET, PRO, AND GLY PROTEIN 1" (CMPG1)                           | 1          |
| AT1G66200        | GLUTAMINE SYNTHASE CLONE F11 (GSR2)                                  | 2          |
| AT1G68140        | zinc finger/BTB domain protein, putative (DUF1644)                   | 2          |
| AT1G72430        | SMALL AUXIN UPREGULATED RNA 78 (SAUR78)                              | 1          |
| AT2G20560        | DNAJ PROTEIN (DNAJ)                                                  | 3          |
| AT2G24850        | TYROSINE AMINOTRANSFERASE 3 (TAT3)                                   | 6          |
| AT2G29450        | GLUTATHIONE S-TRANSFERASE TAU 5 (GSTU5)                              | 1          |
| AT2G47450        | CHAOS (CAO)                                                          | 1          |
| AT2G47710        | Adenine nucleotide alpha hydrolases-like superfamily protein         | 3          |
| AT3G10350        | GUIDED ENTRY OF TAIL-ANCHORED PROTEINS 3B (GET3B)                    | 1          |
| AT3G26450        | Polyketide cyclase/dehydrase and lipid transport superfamily protein | 2          |
| AT3G26650        | glyceraldehyde-3-phosphate dehydrogenase A subunit                   | 1          |
| AT3G29160        | SNF1 KINASE HOMOLOG 11 (KIN11)                                       | 1          |
| AT3G44110        | Putative dnaj-like protein (J3)                                      | 4          |
| AT3G45030        | Ribosomal protein S10p/S20e family protein                           | 1          |
| AT3G48000        | ALDEHYDE DEHYDROGENASE 2B4 (ALDH2B4)                                 | 11         |
| AT3G55270        | FRUCTOSE-BISPHOSPHATE ALDOLASE 8 (FBA8)                              | 1          |
| AT3G55605        | Mitochondrial glycoprotein family protein                            | 2          |
| AT3G57520        | SEED IMBIBITION 2 (SIP2)                                             | 1          |
| AT4G04770        | ATP-BINDING CASSETTE I8 (ABC18)                                      | 4          |
| AT4G13430        | ISOPROPYL MALATE ISOMERASE LARGE SUBUNIT 1 (IIL1)                    | 1          |
| AT4G23570        | (SGT1A)                                                              | 1          |
| AT4G24020        | NIN LIKE PROTEIN 7 (NLP7)                                            | 6          |
| AT4G26910        | Dihydroipoamide succinyltransferase                                  | 4          |
| AT4G31850        | PROTON GRADIENT REGULATION 3 (PGR3)                                  | 1          |
| AT4G33670        | L-galactose dehydrogenase                                            | 1          |
| AT4G35090        | CATALASE 2 (CAT2)                                                    | 1          |
| AT4G35830        | ACONITASE 1 (ACO1)                                                   | 3          |
| AT5G08280        | HYDROXYMETHYLBILANE SYNTHASE (HEMC)                                  | 1          |
| AT5G09590        | MITOCHONDRIAL HSO70 2 (MTHSC70-2)                                    | 1          |
| AT5G11040        | (TRS120)                                                             | 1          |
| AT5G12020        | 17.6 KDA CLASS II HEAT SHOCK PROTEIN (HSP17.6II)                     | 10         |
| AT5G20480        | EF-TU RECEPTOR (EFR)                                                 | 2          |
| AT5G24460        | RING-H2 zinc finger protein                                          | 1          |
| AT5G50210        | QUINOLINATE SYNTHASE (QS)                                            | 3          |
| AT5G58590        | RAN BINDING PROTEIN 1 (RANBP1)                                       | 1          |

**Table S3.** List of primers and oligonucleotide sequences used for mutant genotyping.

| Mutant code in this study # | Gene Accession | Mutant Accession no | Forward primer         | Reverse primer        |
|-----------------------------|----------------|---------------------|------------------------|-----------------------|
| 12                          | AT5G02320      | N531972             | GTTCAATTTGTGCTCAATCCC  | CCATTTGTTCCGTACATTCG  |
| 22                          | AT5G28020      | N552788             | TGATTGGTAACACACCAATGG  | CCACCTGCCAAATGAATTATC |
| 26                          | AT1G67070      | N570922             | GCCCTTTAGTTGAGTGGTGTG  | CGTGAAGTGTGGAGAAAAGAG |
| 54                          | AT3G07370      | N612098             | CACAAGGCTGAGAGCAAAATC  | CTCGATTGGTCCAATAAGCAG |
| 55                          | AT4G12120      | N620492             | TGGCTTCTTTGATTTGTGGG   | TTGAAATTCGGGTGTGTCTC  |
| 61                          | AT4G12120      | N635470             | AGGCAACCTATGACAGCAATG  | GAATGAGAGGTGCATCTGAG  |
| 72                          | AT4G19040      | N654195             | CTGTTCTCCGCTGTATTTGC   | ATAGCAATGATTTTTGGTGCG |
| 75                          | AT3G01650      | N655271             | TTTTGATTTGGGTCCTTACC   | AGCAATGAATGGACAGGTTTG |
| 76                          | AT3G01650      | N655733             | ACAAACCTGTCCATTCATTGC  | TTCCCTTTGACCTGTTGAGTG |
| 77                          | AT2G32390      | N656359             | TGGCCAGGGGAAGTAATAAAG  | TGTCGACATGTCCACAGCTAG |
| 78                          | AT3G07370      | N657213             | TACCTTATGATGGCCCATGTC  | GAAGATGCTCGAATCCAACAG |
| 80                          | AT4G19040      | N657975             | AGGCTTAAAAACATCATGG    | TAACCATTTGGCACTGAAGG  |
| 81                          | AT5G67600      | N658196             | TATGGACTAACATGTGGGTGG  | CCAATTCCTCTCGAGCAAAAG |
| 83                          | AT5G28020      | N659687             | TTCAATAGCCTCTTCACCTGC  | ACAGACCAACATGGAAGATCG |
| 85                          | AT1G53850      | N661066             | TTTGTGCGTTGAACCTGAGTG  | AGCTTCAATGGCATATTCCAC |
| 86                          | AT4G19040      | N661471             | TACATTGGAAACAGTCGAGC   | GGCAGAGGATGAAGAGGACTC |
| 87                          | AT2G41440      | N661599             | CAGAGCAAGAAGTGGGAAATG  | TTTTCCAGATATGGATGCAGC |
| 89                          | AT5G28020      | N663434             | CCTCCACTAGGAAAAACCACC  | TGAGATGATGGAGCCTTGTTT |
| 96                          | AT5G14420      | N670818             | AAAGAGAGAGAAGGGTCGTCG  | TGACGAGGACAACCTGATTCC |
| 98                          | AT1G78380      | N672766             | TTTTTGTGTGCGTGAACAAG   | TTCGTCTGAGCTCAGGAAG   |
| 100                         | AT3G26340      | N673661             | ACATAGTACAATCCAGGGCCC  | ACAACTATGCCTGTGATTGGC |
| 101                         | AT3G57090      | N673702             | AAGTCATTGCTCCAATACCCC  | GCTGATTGGAGACAAGCTTTG |
| 102                         | AT4G01960      | N674268             | GTGAAAGCGAAGGAAGATTTC  | TCCAATTCAAAGAACGAATGC |
| 103                         | AT3G07370      | N674983             | CAACCACAATGGTGGGTTTAC  | CTTGGAACCTGTCTTTGTGG  |
| 104                         | AT4G01960      | N675193             | GTGAAAGCGAAGGAAGATTTC  | TCCAATTCAAAGAACGAATGC |
| 105                         | AT3G26340      | N675921             | ATGCACGTTCCGATATAGGAC  | GTTGTACCTTTGCAGGCTTC  |
| 107                         | AT4G19170      | N680044             | TTCTCCAATCACAACCCAAG   | TTAGCGTCCATCACCAGAAAC |
| 109                         | AT2G36020      | N682206             | GAACGTGTATGAACCAATGGC  | TTGGCGCTAATTCATCATTC  |
| 110                         | AT5G11610      | N682800             | TCTCTTTTCGCTTCCCTTTC   | ATTTGTACGGTTGTGTCCG   |
| 111                         | AT1G67070      | N682894             | TCTGTCAATTCAGACGAGGAAG | ATTCACATGACTCGGTCCAG  |
| 112                         | AT5G11610      | N684240             | GCCTTCACAAAAGTTTGCAG   | GAGCTTGACGGTTACGTTAG  |
| 113                         | AT5G67600      | N685290             | ATGCATCCAAGAGACAGCAAC  | ATTGGGTTTTTAGTTGCGTC  |
| 114                         | AT4G19040      | N685788             | GAAACTGTGGAGCAATATGG   | TCCACTTCGACGAAAAACAAG |
| 115                         | AT3G57090      | N686450             | AAGATCCTCCTTGACCTCGAC  | GGGAATTAATCAAGGAGCAGG |
| 121                         | AT2G32390      | N859735             | GTCAGCTTCTCCTACATTGCG  | CTGAAGATTGTGGACCAATGG |

|             |           |         |                                    |                        |
|-------------|-----------|---------|------------------------------------|------------------------|
| 122         | AT5G14420 | N450195 | TTATTCGTACCTGCCCATCTG              | ACGTGACGTGATTGAATCTCC  |
| 123         | AT5G14420 | N548485 | GACGAATTGGTACCGTCATTC              | GGAAACAGAGTTTGCCTTTC   |
| 128         | AT1G53850 | N651939 | GATGGCGATTAATTAGGAGCC              | GAAGGAGTTGTGCTTGCTGTC  |
| 129         | AT1G53850 | N645344 | AATGTGTGATATTTGGGGTGG              | TAATTGATCTGCGAATCGGAG  |
| 130         | AT1G69790 | N527863 | AAAGGGCTTTTGAGCTGCTAG              | GAGTCGAGATGACTGATTCGG  |
| 131         | AT1G69790 | N597486 | TGCCAACCCAAAATCAGATAG              | CTTCTCTTCTCGAATTCGCC   |
| 132         | AT3G59110 | N683911 | TCATTTTAGGCCGTTTCTGTG              | TGTGCATCATCATGAGAGAGC  |
| 133         | AT3G59110 | N684083 | AGTGGCGTGGATGACAAGTAC              | TTTGGTGTCTGCTGCTAGAG   |
| 134         | AT1G52540 | N685325 | TGATTCAGCCAAACGGTAAAC              | ATACACTGCCAAATCTGCC    |
| 139         | AT3G19230 | N680649 | TTTGATCAGATCATTGGAGGC              | TTTGGTTGCAAAAAGGCATAC  |
| 141         | AT3G17420 | N668207 | GAGTTAGCGTATTAGGTGCG               | AACCCCTTGTGGACTTCTTC   |
| 144         | AT3G12620 | N656211 | TCTTATCCCAAACGTATCGTTG             | AAGCCCATCCTTAGAGCAGAG  |
| 145         | AT3G12620 | N662121 | CGCGACAAATGTGTATTGATG              | TTGCTGCCTCTCTTAGAGCTG  |
| 146         | AT5G07180 | N681024 | TATGGCAAAGGTGATACCTGG              | TATCTCATGGCAACAAGCTC   |
| 147         | AT5G07180 | N800028 | CAAGCTCAGCAGGTATTTTGC              | ATATGTGTAGCTGACGGGTC   |
| 148         | AT5G07180 | N684732 | ACTCGTGAAGATGTCCATTGG              | AGCTGGTGATTCTTCACATGG  |
| 149         | AT5G20480 | N654241 | TTTCAAACAAGGTTTCTCCAATC            | CGCTTCTCTCAACCAATTTG   |
| 151         | AT4G15780 | N670510 | TCCGTGGAACGATAAATTCAG              | TATCGCCAAGTAATGCGAATC  |
| 152         | AT4G15780 | N874999 | TGTGATAGGGTTGTTTTCCC               | GAAATCAGCTTTCACAGCTC   |
| 154         | AT3G54300 | N527783 | ACCAAAGCCATTGTCAACAAG              | AACTGGAGTTGGAGGAACCTC  |
| 156         | AT5G47200 | N653446 | CTGACAAGGAAAAACGCAAAG              | TTGCCTATCTTTCAGGTAC    |
| 163         | AT3G05710 | N677254 | CATCTAGACGCCGAGATCTTG              | TCTTGTCTATTTGATGCTCAC  |
| 164         | AT4G30260 | N653255 | TGGAACCTCAAGAATCATG                | TCAATGTATTTGGCGGAGATC  |
| 165         | AT4G30260 | N660179 | TTGGAAGTTGGAACCTTTGTG              | GCGGCTGGAGAATTCTCTATC  |
| 168         | AT2G43490 | N668005 | TAACCAGTTGCAAGATCAACC              | CAAGCGTCTTTTATAGCGAC   |
| 169         | AT2G43490 | N682830 | GGTATTTTCGACTTCCCTCG               | AAACGACACAAGGGACATGTG  |
| 170         | AT1G05785 | N672831 | TTAAGTCAACGCCAATCCTTG              | CTAACTTTGCAGCGGATTTTG  |
| 173         | AT3G15980 | N678521 | ACTCTTGAGTACCTCGCTCC               | TGTATTCTGGCATGGGAAAAC  |
| 179         | AT5G23540 | N681956 | TGGATGTAAGTAGGATTGGCG              | TTTTGCTTGTGTTGTTTGC    |
| 183         | AT3G13235 | N674812 | TGCTCGAGGTTGAGGTAAGAG              | TGTCGACTGTGCACCACTATC  |
| 187         | AT4G19006 | N682762 | GGCTTAAGCCTTAAAGGCAAC              | TGTGGACTCACTCTCGGAATC  |
| 190         | AT5G44190 | N661106 | GATTGGTAATCTCTATCGCATGG            | GCATCAGCAACCACTCTATCC  |
| 191         | AT2G26410 | N661133 | CATTTGCAACACCAGTTGTTG              | TGAAATTCATAGCGGAGACG   |
| 194         | AT4G00710 | N666828 | GGTAAAGAGTACGGCCTTTGC              | ACGTTTCATGTCGATTCCTTTG |
| 195         | AT4G00710 | N661796 | CTCACTCCGTAGCTGACCAAC              | TATATAAAAAGCCCATGGGCC  |
| tat3-1      | AT2G24850 | N403572 | TGGGGAAGTTTGCATCAATAG              | AATGTGGACTTGTGGCATAGG  |
| LB1_SAIL    |           |         | GCCTTTTCAGAAATGGATAAATAGCCTTGCTTCC |                        |
| LBb1.3_SALK |           |         | ATTTTGCCGATTTCCGGAAC               |                        |
| GABi_o8409  |           |         | ATATTGACCATCATACTCATTGC            |                        |

**Table S4.** List of primers and oligonucleotide sequences used for RT-qPCR and RKS1 constructs.

| Gene or Mutant line in this study # | Primer (5' - 3')           | Primer (5' - 3')           |
|-------------------------------------|----------------------------|----------------------------|
| AT2G28390                           | AACTCTATGCAGCATTGTGATCCACT | TGATTGCATATCTTTATCGCCATC   |
| AT3G57710                           | GAAATTGTTGGTGGCTTCAA       | TCCGTTATCCAAGAACCACCTC     |
| AT1G66560                           | AGACGAATCCCCGACTCC         | GCATAGGTACACCGATAGTAACACC  |
| AT1G51760                           | AGGGCTGATATGGATGCACT       | GTGCATCTTCCCTGGAACC        |
| AT4G01895                           | CAGAGAACAAAAGGATCAACGAG    | TTCGTTTCTTAGCATCCTGGTAG    |
| AT3G01650                           | CGAGCTTTCGATAACTTCCAGT     | GGGATCTCCATGAGAGCAGA       |
| AT4G31860                           | CAGCAGGTCTTAGTGATGAGG      | TGCATCATCTCATCCATTCTG      |
| AT5G14420                           | CCTCAGTATGGTGCAGAAAGC      | CAGGAGGTTGGGCATAAGAA       |
| AT5G67600                           | AGGATAATTATATACGTTGCCTCA   | GAAAGAGAGAGATAAATTATGGTCCG |
| AT5G19080                           | ATGCCTTATTCGATGGCAGT       | GGGACGATTGTGCACCTTTG       |
| AT3G26340                           | TGCGTTTATCTTAAAGGAAGGTG    | TCTTACAGATTGCGACGAG        |
| AT2G23600                           | TGAAGCACCGTCTCTACCAA       | GGCCTCTTAGAAGCAATCCA       |
| AT5G11610                           | AAACATCATCTCAAGCTTACCTG    | GCTCAAAATACTGAAGGCCTGA     |
| AT5G44572                           | CTTAGCCAATCGGCTCCTT        | TGCTATTATCCCCCATTCG        |
| AT4G32980                           | TCTGAAATCTTCCCAAAGGTTT     | TTGTTGTGTCCATTGGGTTT       |
| AT5G28030                           | CGGTTACTGGAACAGGGAAG       | TCAAATGTGGACCTGGTTTTC      |
| AT1G20823                           | ATTCTGATCTCGTCGTCATCC      | TTAAGCCGAGAACGCAAATC       |
| AT5G28020                           | TTCCTCAAGGAGCAGAACAAA      | TCAAATGTGGACCTGGTTGA       |
| AT2G14610                           | GGAGCTACGCAGAACTAAGA       | CCCACGAGGATCATAGTTGCAACTGA |
| AT3G45640                           | TGACCCCAACAGAATCAC         | AAAAGAGAATGGCTTTTGACAGA    |
| AT3G50950                           | CAAAACAACAAGTACATGGATGG    | TTCCGTTTCTCCACATGACA       |
| AT3G48000                           | CCATGTTTGCAAGATTGTTC       | GCTGGAATTGTTAGTCCATGAAT    |
| 12                                  | TGGGAAACAATGTCGAGAAA       | CGATGAGAATTCATGAGAGCTG     |
| 22 / 83 / 89                        | CAAGCTTCTTGCCCTCAAAG       | AGTTTCCCGCGTTTTCT          |
| 26 / 111                            | CCAATTCTCAAAGTGTAGGAA      | AAATGACAACCTCTGAATTTGC     |
| 54 / 78 / 103                       | CGTTCCAAATCTGGCTATCAA      | TGTAAGCCAGAGCTGTTTTT       |
| 55                                  | AGTTTGGCCTCACTAAAGGAA      | GAATCAACTCTCGGTAAGTTGCA    |
| 61                                  | GAGCAGGACCTTGTTTTTGG       | AGCTTGCTTTCGTGGCTTAT       |
| 72 / 80 / 86 / 114                  | CACAACATATCCATCTTCAAAAGG   | GCCTGTACAGGAAAGCCATT       |
| 75 / 76                             | ACCGGTGCAGAGTGGATCATCA     | GTAAAGCTTGATTCTGGTCT       |
| 77 / 88 / 121                       | CGAGGAGGCTGGTTCTTCTA       | TCTCTGCTTCTCTTATCAACAACT   |
| 81 / 113                            | AGGATAATTATATACGTTGCCTCA   | GAAAGAGAGAGATAAATTATGGTCCG |
| 85 / 128 / 129                      | GAATGACATGGGAGCCAAAAG      | GGGTAATTTACCTATCAGCTTGTG   |
| 96 / 122 / 123                      | GACATGGCCTTGGTTGTG         | GCAAATCGGACACATTTGAA       |
| 98                                  | CCTTCTGATCCTTACCTGAGAGC    | CCTCTGAGCATATACAGCTTC      |
| 100 / 105                           | GGGACTTCTGTTGGCACA         | TCGTTGTCAACATAGTACAATCCA   |
| 101 / 115                           | TGTGTATACAATGGCAGTTTACTTTT | TGAAGTAAGCAGTGGAGAACACA    |
| 102 / 104                           | TGAGTTTGCTCCTCGTGAGA       | TGTCTGCACCTGAGACTCTCTTA    |
| 107                                 | TTCGCTCCTGTCTCGAC          | AAGAGTGCCGTGGATGATTT       |
| 109                                 | AGCTGCGACGTTCTAACTCC       | CGTATATGTACGTTTGGCTTACTATG |
| 110 / 112                           | TCGATCATAAATCATACATCCGTTA  | CTTCCTTAGATTCCGGATCTCTT    |
| 130 / 131                           | AAGGAAGCCTGGAGAACCAT       | AAGCTACTTTCATCCTAGTCTTCCAC |
| 132 / 133                           | TGACACAAGCAAAGGGCCTG       | ACGAGAAAACCTCATTGGCCATC    |
| 134                                 | CGCAGCAACAAACAGTTTAAAT     | CCTTCAATCTCTGACTGCAATTT    |
| 139                                 | TGCAAAGCTCCCTAGTCTCC       | TCAGGAGACGCCTGGATAGT       |
| 141                                 | ATTATGCGCGGCCTAAAGA        | TCCACCCTTCTCAAACCTGT       |
| 144 / 145                           | TAGAGTCAAGTAGAAGGTCCAGCTAA | CCGACCTCTCCTCCTCATCT       |
| 146 / 147 / 148                     | TCGGTATTGTCCTTCTTGAGC      | CATCCGCCTTGGATAGAATCAT     |
| 149                                 | TCATGTTAGTGACTTTGGTTTGG    | GCCTCCCATTCATACTCTG        |
| 151                                 | TTGTGGAAGATGGCTACGC        | CTCCATATCTTCTTGAATCAGC     |
| 152                                 | GACCGAGAATCTACGCTCTCA      | TCCAAGAACCACCAAGTTTT       |
| 154                                 | CCAGATTCTGAGAATTTGAGC      | GCGAGAGAGGAATGATACCTT      |
| 156                                 | TCTTGATTCAATTAGTCACTCC     | ATGGGTTTCAAACCTTCAACG      |
| 163                                 | GGATCCTGGGAATTCGAGA        | TGAAATCTCCTCAGATACATCAACC  |
| 164 / 165                           | TCAGTTTGGGAAGTCATTGG       | TCCACAGGGGAGTTAACAAA       |
| 168 / 169                           | AGCTCTCAGGATGTGGGAGA       | GCAATCATTTCTCAAAGTTTCAGT   |
| 170                                 | AGAGGTGCTCGTTGAAAAAGA      | AAAGAAAGGCTTTGATGTCGTT     |
| 173                                 | ACGCTGGGTAGATTGGAAGA       | TCAGAGCAGCTTCTGGTATCC      |
| 179                                 | ACAGACCGGAAGACCTGAGA       | CTCGCTGATTCAAAGCTTCA       |
| 183                                 | ATGCTGCGTAAGCATCAGTG       | GGGACGGGATGTCTTTCTCT       |

|                 |                                                            |                         |
|-----------------|------------------------------------------------------------|-------------------------|
| 187             | GCCTTATTGAGATCATTTTCAGC                                    | AGTACGCTCGCAATGACA      |
| 190             | CGGAGTTACAACGTCAAGGAG                                      | TTCGACAAATTTTGGAGATCTTT |
| 191             | TGTCGTGTTTCGGTTTGGTGT                                      | CATTAACGCGAAATAAATGGTGT |
| 194 / 195       | TGAAACACTAGCCAAACACCTTT                                    | CGTAGCCTCATAGTCCATTCA   |
| tat3-1          | CCCTGGAGTTTTCAAGGCTA                                       | CGTCGGAAGTCTCCGTTA      |
| attB1F-710      | GGGGACAAGTTTGTACAAAAAAGCAGGCTTAATGAAGAAGCAGTATCTGAAA       |                         |
| attB2R-710      | GGGGACCACTTTGTACAAGAAAGCTGGGTTCGCTAGAATTTTCAATGATGC        |                         |
| attB1_RKS1      | GGGGACAAGTTTGTACAAAAAAGCAGGCTTAATGAAGAAGCAGTATCTGAAAATCTGG |                         |
| attB2R-710-stop | GGGGACCACTTTGTACAAGAAAGCTGGGTTCGCTAGAATTTTCAATGATGC        |                         |
| attB4_RKS1      | GGGGACAACCTTTGTATAGAAAAGTTGGGTGGCTAGAATTTTCAATGATGCTTC     |                         |
| RKS1_D191A_fw   | CCTAAGATCATCATACATAGAGCTGTTAAACCGATGCATGTTTTTC             |                         |
| RKS1_D191A_rev  | GAAAACATGCATCGGTTTAAACAGCTCTATGTATGATGATCTTAGG             |                         |

**Dataset S1 (separate file).** Annotation, logFC and categorization in expression classes of 268 expressed genes. Genes significantly found up-regulated are represented in red, those significantly down-regulated in green.

**Dataset 2 (separate file).** Protein-protein interactions used for the generation of the RKS1 PPI network.

## SI References

1. A.C. da Silva, J.A. Ferro, F.C. Reinach, C.S. Farah, L.R. Furlan, *et al.* Comparison of the genomes of two *Xanthomonas* pathogens with differing host specificities. *Nature* **417**, 459-463 (2002).
2. M.K. Winson, S. Swift, P.J. Hill, C.M. Sims, G. Griesmayr, B.W. Bycroft, P. Williams, G. Stewart Engineering the lux CDABE genes from *Photobacterium luminescens* to provide a bioluminescent reporter for constitutive and promoter probe plasmids and mini-Tn5 constructs. *FEMS Microbiol. Lett.* **163**, 193-202 (1998).
3. S.J. Clough, A. F. Bent. (1998) Floral dip: a simplified method for *Agrobacterium*-mediated transformation of *Arabidopsis thaliana*. *Plant J.* **16**(6):735±43. PMID: 10069079
4. Y. Gu, R. W. Innes, The KEEP ON GOING protein of *Arabidopsis* recruits the ENHANCED DISEASE RESISTANCE1 protein to trans-Golgi network/early endosome vesicles. *Plant Physiol.* **155**, 1827–1838 (2011).
5. S.L. Asqui, D. Vercammen, I. Serrano, M. Valls, S. Rivas, F. Van Breusegem, F. L. Conlon, J.L. Dangl, AtSERPIN1 is an inhibitor of the metacaspase AtMC1-mediated cell death and autocatalytic processing *in planta*. *New Phytol.* **218**, 1156-116 (2018).
6. J. Marion, L. Bach, Y. Bellec, L. Gissot, J.D. Faure, Systematic analysis of protein subcellular localization and interaction using high-throughput transient transformation of *Arabidopsis* seedlings. *Plant J.* **56**, 169–179 (2008).

7. D. Marino, S. Froidure, J. Cannone, S. Ben Khaled, M. Khafif, C. Pouzet, A. Jauneau, D. Roby, S. Rivas, Arabidopsis ubiquitin ligase MIEL1 mediates degradation of the transcription factor MYB30 weakening plant defence. *Nature Com* **4**, 1476 (2013).
8. B. Lefebvre, T. Timmers, M. Mbengue, S. Moreau, C. Hervé, K. Toth, J. Bittencourt-Silvestre, D. Klaus, L. Deslandes, L. Godiard, J. D. Murray, M.K. Udvardi, S. Raffaele, S. Mongrand, J. Cullimore, P. Gamas, A. Niebel, T. Ott, A remorin protein interacts with symbiotic receptors and regulates bacterial infection. *Proc. Natl. Acad. Sci. U S A* **107**, 5, 2343-2348 (2010).
9. S. Froidure, J. Canonne, X. Daniel, A. Jauneau, C. Brière, *et al.*, AtsPLA2-alpha nuclear relocalization by the Arabidopsis transcription factor AtMYB30 leads to repression of the plant defense response. *Proc. Natl. Acad. Sci. U S A* **107**, 15281–15286 (2010).
10. R.D. Gietz , R.H. Schiestl, High-efficiency yeast transformation using the LiAc/SS carrier DNA/PEG method. *Nature Protoc.* **2**(1):31-4 (2007).
11. D. Meyer, E. Lauber, D. Roby, M. Arlat, T. Kroj, Optimization of pathogenicity assays to study the *Arabidopsis thaliana*-*Xanthomonas campestris* pv. *campestris* pathosystem. *Mol Plant Pathol* **6**, 327–333 (2005).
12. U.K. Laemmli, Cleavage of structural proteins during the assembly of the head of bacteriophage T4. *Nature*, **227**(5259), 680-685 (1970).
13. C. Huard-Chauveau, L. Perchepped, M. Debieu, S. Rivas, T. Kroj, I. Kars, J. Bergelson, F. Roux, D. Roby, An atypical kinase under balancing selection confers broad-spectrum disease resistance in Arabidopsis. *PLoS Genet.* **9**(9):e1003766. (2013).
14. R. Oughtred, C. Stark, B.J. Breitkreutz, J. Rust, L. Boucher, C. Chang, N. Kolas, L. O'Donnell, G. Leung, R. McAdam, F. Zhang, S. Dolma, A. Willems, J. Coulombe-Huntington, A. Chatr-aryamontri, K. Dolinski, M. Tyers, The BioGRID interaction database: 2019 update. *Nucl. Acid Res.*, **47**(D1) D529–D541 (2019).
